# Supplementary material
Source: PubMed Central journal article supplement (PMC7733389)
Supplement: NIHMS1650642-supplement-Supporting_Information.pdf [file NIHMS1650642-supplement-Supporting_Information.pdf]

# Supporting Information

## Transport of legacy perfluoroalkyl substances and the replacement compound HFPO-DA through the Atlantic Gateway to the Arctic Ocean – Is the Arctic a sink or a source?

Hanna Joerss,<sup>\*,†,‡</sup> Zhiyong Xie,<sup>†</sup> Charlotte C. Wagner,<sup>§</sup> Wilken-Jon von Appen,<sup>||</sup>  
Elsie M. Sunderland,<sup>§</sup> Ralf Ebinghaus<sup>†</sup>

<sup>†</sup> Department for Environmental Chemistry, Helmholtz-Zentrum Geesthacht, Centre for Materials and Coastal Research, 21502 Geesthacht, Germany

<sup>‡</sup> Institute of Inorganic and Applied Chemistry, Universität Hamburg, 20146 Hamburg, Germany

<sup>§</sup> Harvard John A. Paulson School of Engineering and Applied Science, Harvard University, Cambridge, Massachusetts 02138, United States

<sup>||</sup> Section Physical Oceanography of Polar Seas, Alfred Wegener Institute, Helmholtz Centre for Polar and Marine Research, 27570 Bremerhaven, Germany

### \* Corresponding author

Phone: +49 4152 872353

E-mail: hanna.joerss@hzg.de

### Contents

Number of pages: 41

Number of tables: 23

Number of figures: 10

Number of sections: 5

## CONTENTS

### Sampling

|                                                                                                                                                                             |    |
|-----------------------------------------------------------------------------------------------------------------------------------------------------------------------------|----|
| <b>Table S1:</b> Sampling locations of surface seawater samples analyzed in this study and physicochemical parameters measured in the water phase. ....                     | S4 |
| <b>Figure S1:</b> A) Salinity data and B) water temperature data from <i>Polarstern</i> cruise PS114. ..                                                                    | S5 |
| <b>Table S2:</b> Sampling information for depth profiles analyzed in this study and physicochemical parameters measured in samples from the respective sampling depths..... | S6 |

### Analytical Method

|                                                                                                                                                                                                      |     |
|------------------------------------------------------------------------------------------------------------------------------------------------------------------------------------------------------|-----|
| <b>Table S3:</b> Overview of analytical standards, CAS numbers, the standard suppliers, purity and concentration/amount. ....                                                                        | S8  |
| <b>Table S4:</b> Chemicals used for sample preparation and cleaning. ....                                                                                                                            | S9  |
| <b>Section S1:</b> Sample extraction.....                                                                                                                                                            | S10 |
| <b>Table S5:</b> LC parameters and MS/MS parameters of the instrumental method for PFAS analysis. ....                                                                                               | S10 |
| <b>Table S6:</b> Retention times, precursor ion, monitored mass transitions, transition-specific parameters and corresponding internal standards used for quantification of the target analytes..... | S11 |
| <b>Section S2:</b> Quantification of the target analytes .....                                                                                                                                       | S13 |

### Quality Assurance/Quality Control

|                                                                                                                                                                                                                                                              |     |
|--------------------------------------------------------------------------------------------------------------------------------------------------------------------------------------------------------------------------------------------------------------|-----|
| <b>Figure S2:</b> LC-MS/MS chromatograms of PFOA showing differences in contamination between cartridges of the same manufacturer and part number, packed with different WAX resin sorbent batches. ....                                                     | S14 |
| <b>Figure S3:</b> Preparation and analysis of blank samples.....                                                                                                                                                                                             | S14 |
| <b>Table S7:</b> Mean concentrations of PFASs in procedural blanks $\pm$ standard deviation (SD), method detection limits (MDLs) and method quantification limits (MQLs).....                                                                                | S15 |
| <b>Section S3:</b> Data analysis. ....                                                                                                                                                                                                                       | S16 |
| <b>Table S8:</b> Coefficients of variation [%] for quantified PFASs, calculated from triplicate analysis of surface water samples taken by seawater intake system and samples taken by CTD/rosette sampler and seawater intake system at the same time. .... | S17 |
| <b>Table S9:</b> Matrix spike recoveries for seawater.....                                                                                                                                                                                                   | S18 |
| <b>Table S10:</b> Percentage absolute recoveries of internal standards in analyzed seawater samples (n=109). ....                                                                                                                                            | S19 |
| <b>Table S11:</b> Verification of the method's trueness by analysis of the reference material IRMM-428. ....                                                                                                                                                 | S20 |
| <b>Figure S4:</b> Comparison of measured values with laboratory intercomparison results.....                                                                                                                                                                 | S20 |
| <b>Section S4:</b> Water transport data used for calculation of PFAS mass transport estimates through Fram Strait. ....                                                                                                                                      | S21 |

## Results and Discussion - Surface Water Samples

|                                                                                                                                                                                                                                                                                    |     |
|------------------------------------------------------------------------------------------------------------------------------------------------------------------------------------------------------------------------------------------------------------------------------------|-----|
| <b>Table S12:</b> Detection frequencies [%], concentration ranges [pg/L], mean concentrations [pg/L] and median values [pg/L] of detected PFASs in surface water samples of the entire study area and along a latitudinal transect from the European continent to the Arctic. .... | S23 |
| <b>Table S13:</b> Detection frequencies [%], concentration ranges [pg/L], mean concentrations [pg/L] and median values [pg/L] of detected PFASs in surface water samples along a longitudinal and a latitudinal sampling transect in Fram Strait. ....                             | S24 |
| <b>Table S14:</b> Concentrations [pg/L] of detected PFASs in surface seawater samples taken along a latitudinal transect from the European continent to the Arctic. ....                                                                                                           | S26 |
| <b>Table S15:</b> Concentrations [pg/L] of detected PFASs in surface seawater samples taken along a longitudinal transect across Fram Strait. ....                                                                                                                                 | S26 |
| <b>Table S16:</b> Concentrations [pg/L] of detected PFASs in surface seawater samples taken along a latitudinal transect along the prime meridian. ....                                                                                                                            | S26 |
| <b>Figure S5:</b> Boxplots showing PFAS concentrations in surface water samples from the North Sea continental shelf, the continental slope and deep water regions of the Norwegian Sea and Greenland Sea. ....                                                                    | S27 |
| <b>Section S5:</b> Potential sources of HFPO-DA to European coastal waters. ....                                                                                                                                                                                                   | S28 |
| <b>Figure S6:</b> Sampling locations of reanalyzed samples, taken in the Rhine-Meuse delta in 2008. ....                                                                                                                                                                           | S29 |
| <b>Figure S7:</b> LC-MS/MS chromatograms of the replacement compound HFPO-DA in sample extracts from 2008. ....                                                                                                                                                                    | S29 |
| <b>Figure S8:</b> Sea ice concentration in the Arctic during the cruise. ....                                                                                                                                                                                                      | S30 |
| <b>Table S17:</b> Pearson correlation coefficients $r$ between physicochemical parameters and PFASs in surface water samples taken across Fram Strait. ....                                                                                                                        | S31 |

## Results and Discussion - Depth Profiles

|                                                                                                                                                                                                                                                                                                                                                |     |
|------------------------------------------------------------------------------------------------------------------------------------------------------------------------------------------------------------------------------------------------------------------------------------------------------------------------------------------------|-----|
| <b>Table S18:</b> Detection frequencies [%], concentration ranges [pg/L], mean concentrations [pg/L] and median values [pg/L] of detected PFASs in all samples and in different water masses (Atlantic Water (AW), Polar Surface Water (PSW)) of the seven depth profiles taken in Fram Strait. ....                                           | S32 |
| <b>Table S19:</b> Detection frequencies [%], concentration ranges [pg/L], mean concentrations [pg/L] and median values [pg/L] of detected PFASs in different water masses (Recirculating Atlantic Water/Arctic Atlantic Water (RAW/AAW), Intermediate Waters (IW) and Deep Waters (DW)) of the seven depth profiles taken in Fram Strait. .... | S33 |
| <b>Table S20:</b> Concentrations [pg/L] of detected PFASs in depth profiles. ....                                                                                                                                                                                                                                                              | S34 |
| <b>Table S21:</b> Water mass definitions used in this study. ....                                                                                                                                                                                                                                                                              | S35 |
| <b>Figure S9:</b> Potential temperature $\theta$ [°C] versus salinity [psu] plots. ....                                                                                                                                                                                                                                                        | S36 |
| <b>Table S22:</b> PFAS mass transport estimates through Fram Strait via the boundary currents, based on water transport data derived from MITgcm. ....                                                                                                                                                                                         | S37 |
| <b>Table S23:</b> PFAS mass transport estimates through Fram Strait via the boundary currents, based on water transport data derived from observations (mooring array). ....                                                                                                                                                                   | S38 |
| <b>Figure S10:</b> Comparison of estimated net transport of PFASs through Fram Strait based on water transport data derived from A) MITgcm and B) observational data (mooring array) ....                                                                                                                                                      | S39 |

**Table S1: Sampling locations of surface seawater samples analyzed in this study and physicochemical parameters measured in the water phase.**

| sample name                                                                                                                           | latitude °N | longitude °E | date   time of sampling (UTC) | water depth [m] | temperature [°C] <sup>1</sup> | pH <sup>1</sup> | salinity [PSU] <sup>1</sup> |
|---------------------------------------------------------------------------------------------------------------------------------------|-------------|--------------|-------------------------------|-----------------|-------------------------------|-----------------|-----------------------------|
| <b>Latitudinal transect</b> from the European continent to the Arctic (57°N to 79°N at ~5°E)<br>distance between N1 and N21: 2,432 km |             |              |                               |                 |                               |                 |                             |
| N1                                                                                                                                    | 57.137      | 5.409        | 11.07.2018   09:29            | 51              | na <sup>2</sup>               | na <sup>2</sup> | na <sup>2</sup>             |
| N2                                                                                                                                    | 57.735      | 5.023        | 11.07.2018   12:53            | 96              | 14.52                         | na <sup>2</sup> | 32.22                       |
| N3                                                                                                                                    | 58.539      | 4.488        | 11.07.2018   17:17            | 277             | 11.14                         | na <sup>2</sup> | 33.73                       |
| N4                                                                                                                                    | 60.618      | 4.169        | 12.07.2018   04:12            | 300             | 14.08                         | na <sup>2</sup> | 31.78                       |
| N5                                                                                                                                    | 62.007      | 4.203        | 12.07.2018   11:16            | 148             | 13.08                         | 8.19            | 32.59                       |
| N6                                                                                                                                    | 63.109      | 4.256        | 12.07.2018   16:50            | 978             | 13.04                         | 8.28            | 34.69                       |
| N7                                                                                                                                    | 64.035      | 4.305        | 12.07.2018   21:40            | 1410            | 12.93                         | 8.27            | 34.87                       |
| N8                                                                                                                                    | 65.301      | 4.374        | 13.07.2018   04:18            | 976             | 12.20                         | 8.24            | 35.02                       |
| N9                                                                                                                                    | 66.139      | 4.423        | 13.07.2018   08:32            | 1219            | 11.36                         | 8.27            | 34.86                       |
| N10                                                                                                                                   | 67.042      | 4.474        | 13.07.2018   13:11            | 1331            | 10.36                         | 8.22            | 35.05                       |
| N11                                                                                                                                   | 68.140      | 4.540        | 13.07.2018   18:47            | 1765            | 9.91                          | 8.23            | 34.92                       |
| N12                                                                                                                                   | 68.937      | 4.590        | 13.07.2018   22:45            | 3159            | 8.87                          | 8.24            | 35.02                       |
| N13                                                                                                                                   | 70.126      | 4.672        | 14.07.2018   04:51            | 3153            | 8.79                          | 8.24            | 35.01                       |
| N14                                                                                                                                   | 71.087      | 4.739        | 14.07.2018   09:40            | 3048            | 8.26                          | 8.25            | 35.06                       |
| N15                                                                                                                                   | 72.240      | 4.824        | 14.07.2018   15:31            | 2450            | 8.24                          | 8.27            | 35.05                       |
| N16                                                                                                                                   | 73.334      | 4.917        | 14.07.2018   21:02            | 2558            | 7.10                          | 8.26            | 35.03                       |
| N17                                                                                                                                   | 74.803      | 5.025        | 15.07.2018   04:20            | 3203            | 5.45                          | 8.30            | 35.02                       |
| N18                                                                                                                                   | 75.755      | 4.887        | 15.07.2018   09:10            | 2657            | 5.94                          | 8.28            | 35.04                       |
| N19                                                                                                                                   | 76.606      | 4.753        | 15.07.2018   13:27            | 2806            | 5.61                          | 8.34            | 35.04                       |
| N20                                                                                                                                   | 77.722      | 4.568        | 15.07.2018   19:15            | 2890            | 5.36                          | 8.37            | 35.02                       |
| N21                                                                                                                                   | 79.021      | 4.335        | 16.07.2018   14:36            | 2476            | 5.48                          | 8.38            | 34.86                       |
| <b>Longitudinal transect</b> across Fram Strait (9°E to 18°W at ~79°N)<br>distance between F1 and F15: 558 km                         |             |              |                               |                 |                               |                 |                             |
| F1                                                                                                                                    | 79.000      | 9.300        | 19.07.2018   00:10            | 218.0           | 6.12                          | 8.37            | 34.92                       |
| F2                                                                                                                                    | 79.001      | 8.901        | 18.07.2018   23:41            | 216.7           | 5.83                          | 8.36            | 34.93                       |
| F3                                                                                                                                    | 79.018      | 8.459        | 18.07.2018   22:02            | 476.0           | 6.28                          | 8.36            | 34.99                       |
| F4                                                                                                                                    | 79.002      | 7.758        | 18.07.2018   17:20            | 1194.1          | 6.31                          | 8.29            | 35.03                       |
| F5<br>(=N21) <sup>3</sup>                                                                                                             | 79.021      | 4.335        | 16.07.2018   14:36            | 2476.0          | 5.48                          | 8.38            | 34.86                       |
| F6                                                                                                                                    | 79.259      | -1.371       | 26.07.2018   04:43            | 2639.4          | -0.52                         | 8.24            | 31.50                       |
| F7                                                                                                                                    | 78.968      | -5.089       | 27.07.2018   05:36            | 1216.2          | -0.93                         | 8.28            | 30.00                       |
| F8                                                                                                                                    | 79.402      | -9.004       | 29.07.2018   13:38            | 77.8            | -0.36                         | 8.17            | 30.13                       |
| F9                                                                                                                                    | 79.440      | -10.623      | 28.07.2018   04:20            | 104.0           | 0.45                          | 8.09            | 30.37                       |
| F10                                                                                                                                   | 79.819      | -12.273      | 27.07.2018   22:13            | 195.5           | -0.36                         | 8.13            | 30.46                       |
| F11                                                                                                                                   | 79.676      | -13.606      | 29.07.2018   06:42            | 140.0           | -0.14                         | 8.13            | 30.77                       |
| F12                                                                                                                                   | 80.038      | -14.643      | 28.07.2018   01:34            | 171.1           | 0.07                          | 8.11            | 31.42                       |
| F13                                                                                                                                   | 79.618      | -16.591      | 28.07.2018   19:07            | 274.0           | -1.43                         | 8.14            | 30.61                       |
| F14                                                                                                                                   | 80.125      | -16.642      | 28.07.2018   07:18            | 327.0           | -1.41                         | 8.18            | 30.24                       |
| F15                                                                                                                                   | 79.619      | -17.840      | 28.07.2018   15:14            | 439.0           | -1.38                         | 8.16            | 30.00                       |
| <b>Latitudinal transect</b> in Fram Strait (78°N to 81°N at ~0°EW)<br>distance between P1 and P5: 284 km                              |             |              |                               |                 |                               |                 |                             |
| P1                                                                                                                                    | 78.240      | 0.001        | 20.07.2018   09:16            | 3031.3          | 4.41                          | 8.35            | 34.44                       |
| P2                                                                                                                                    | 78.819      | 0.000        | 20.07.2018   13:02            | 2630.1          | 2.40                          | 8.35            | 33.25                       |
| P3                                                                                                                                    | 79.455      | 0.073        | 21.07.2018   14:09            | 2817.3          | -1.25                         | 8.30            | 32.41                       |
| P4                                                                                                                                    | 80.170      | 0.125        | 25.07.2018   06:04            | 3095.4          | -1.26                         | 8.13            | 32.09                       |
| P5                                                                                                                                    | 80.792      | 0.057        | 24.07.2018   20:30            | 3168.8          | -0.87                         | 8.19            | 31.74                       |

<sup>1</sup> Data was taken from von Appen and Rohardt.<sup>1</sup>

<sup>2</sup> As systems measuring the physicochemical parameters had to be set up and calibrated on the first day of the cruise, continuous measurements for those only started on the second day.

<sup>3</sup> At sampling location N21/F5, the latitudinal transect from the European continent to the Arctic and the longitudinal transect across Fram Strait crossed. Consequently, this sample was used for evaluation of both sampling transects.

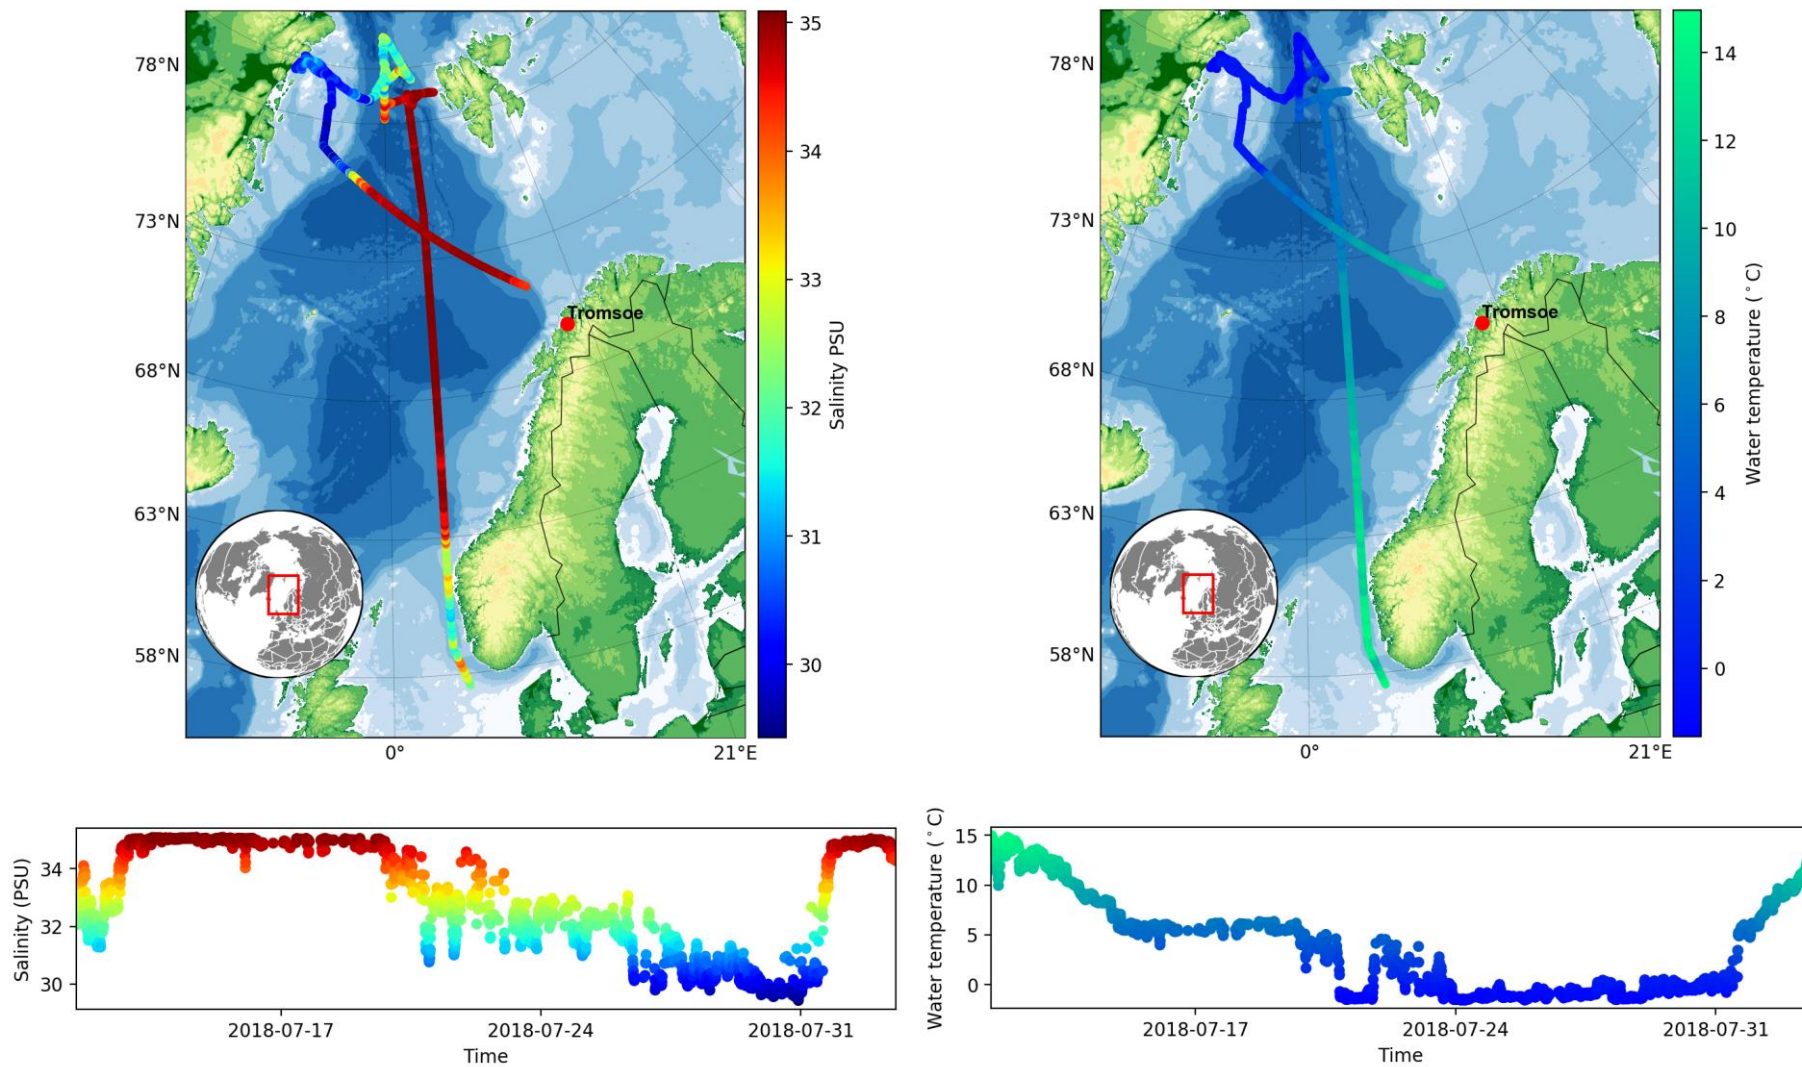

**Figure S1: A) Salinity data and B) water temperature data from Polarstern cruise PS114, measured by sensor TSG1 (SBE21-3189, SBE38-118).** The figure was taken from von Appen and Rohardt.<sup>1</sup> General information on the cruise can be found in the expedition report.<sup>2</sup>

**Table S2: Sampling information for depth profiles analyzed in this study and physicochemical parameters measured in samples from the respective sampling depths.<sup>1</sup>**

| event name <sup>2</sup>        | sample name | latitude °N | longitude °E | date   time (UTC, profile start) | water depth [m] | sampling depth [m] <sup>2</sup> | salinity [PSU] <sup>2</sup> | temperature [°C] <sup>2</sup> | $\theta$ [°C] <sup>3</sup> | $\sigma_0$ [kg/m <sup>3</sup> ] <sup>4</sup> | water mass <sup>5</sup> |
|--------------------------------|-------------|-------------|--------------|----------------------------------|-----------------|---------------------------------|-----------------------------|-------------------------------|----------------------------|----------------------------------------------|-------------------------|
| <b>vertical profile 1 (V1)</b> |             |             |              |                                  |                 |                                 |                             |                               |                            |                                              |                         |
| PS114_12-4                     | V1/1        | 79.012      | 7.033        | 2018-07-18   15:35               | 1277            | 1239                            | 34.91                       | -0.80                         | -0.85                      | 28.08                                        | DW                      |
| PS114_12-4                     | V1/2        | 79.012      | 7.033        | 2018-07-18   15:35               | 1277            | 1000                            | 34.91                       | -0.71                         | -0.75                      | 28.06                                        | DW                      |
| PS114_12-1                     | V1/3        | 79.012      | 7.035        | 2018-07-18   10:41               | 1277            | 500                             | 34.99                       | 2.02                          | 1.99                       | 28.01                                        | AW                      |
| PS114_12-1                     | V1/4        | 79.012      | 7.035        | 2018-07-18   10:41               | 1277            | 250                             | 35.05                       | 3.52                          | 3.50                       | 27.94                                        | AW                      |
| PS114_12-1                     | V1/5        | 79.012      | 7.035        | 2018-07-18   10:41               | 1277            | 100                             | 35.06                       | 4.37                          | 4.36                       | 27.88                                        | AW                      |
| PS114_12-1                     | V1/6        | 79.012      | 7.035        | 2018-07-18   10:41               | 1277            | 75                              | 35.05                       | 4.76                          | 4.76                       | 27.85                                        | AW                      |
| PS114_12-1                     | V1/7        | 79.012      | 7.035        | 2018-07-18   10:41               | 1277            | 50                              | 35.04                       | 5.35                          | 5.35                       | 27.74                                        | AW                      |
| PS114_12-1                     | V1/8        | 79.012      | 7.035        | 2018-07-18   10:41               | 1277            | 10                              | 34.97                       | 6.02                          | 6.01                       | 27.59                                        | AW                      |
| <b>vertical profile 2 (V2)</b> |             |             |              |                                  |                 |                                 |                             |                               |                            |                                              |                         |
| PS114_9-4                      | V2/1        | 78.607      | 5.047        | 2018-07-18   00:37               | 2344            | 2286                            | 34.92                       | -0.74                         | -0.86                      | 28.07                                        | DW                      |
| PS114_9-4                      | V2/2        | 78.607      | 5.047        | 2018-07-18   00:37               | 2344            | 1000                            | 34.91                       | -0.41                         | -0.45                      | 28.07                                        | IW                      |
| PS114_9-1                      | V2/3        | 78.607      | 5.041        | 2018-07-17   18:53               | 2347            | 500                             | 34.93                       | 0.72                          | 0.70                       | 27.96                                        | AW                      |
| PS114_9-1                      | V2/4        | 78.607      | 5.041        | 2018-07-17   18:53               | 2347            | 250                             | 35.01                       | 2.52                          | 2.50                       | 27.88                                        | AW                      |
| PS114_9-1                      | V2/5        | 78.607      | 5.041        | 2018-07-17   18:53               | 2347            | 100                             | 35.04                       | 3.45                          | 3.44                       | 27.79                                        | AW                      |
| PS114_9-1                      | V2/6        | 78.607      | 5.041        | 2018-07-17   18:53               | 2347            | 75                              | 35.03                       | 3.64                          | 3.64                       | 27.74                                        | AW                      |
| PS114_9-1                      | V2/7        | 78.607      | 5.041        | 2018-07-17   18:53               | 2347            | 40                              | 35.01                       | 4.57                          | 4.56                       | 27.67                                        | AW                      |
| PS114_9-1                      | V2/8        | 78.607      | 5.041        | 2018-07-17   18:53               | 2347            | 10                              | 34.96                       | 5.46                          | 5.46                       | 27.53                                        | AW                      |
| <b>vertical profile 3 (V3)</b> |             |             |              |                                  |                 |                                 |                             |                               |                            |                                              |                         |
| PS114_25-2                     | V3/1        | 78.830      | -0.025       | 2018-07-20   15:53               | 2636            | 2573                            | 34.92                       | -0.72                         | -0.86                      | 28.08                                        | DW                      |
| PS114_25-2                     | V3/2        | 78.830      | -0.025       | 2018-07-20   15:53               | 2636            | 1001                            | 34.91                       | -0.23                         | -0.27                      | 28.05                                        | IW                      |
| PS114_25-2                     | V3/3        | 78.830      | -0.025       | 2018-07-20   15:53               | 2636            | 501                             | 34.92                       | 1.09                          | 1.06                       | 27.98                                        | AW                      |
| PS114_25-2                     | V3/4        | 78.830      | -0.025       | 2018-07-20   15:53               | 2636            | 250                             | 35.00                       | 2.75                          | 2.73                       | 27.91                                        | AW                      |
| PS114_25-2                     | V3/5        | 78.830      | -0.025       | 2018-07-20   15:53               | 2636            | 100                             | 34.93                       | 2.59                          | 2.58                       | 27.87                                        | AW                      |
| PS114_25-2                     | V3/6        | 78.830      | -0.025       | 2018-07-20   15:53               | 2636            | 75                              | 34.89                       | 2.58                          | 2.57                       | 27.84                                        | AW                      |
| PS114_25-2                     | V3/7        | 78.830      | -0.025       | 2018-07-20   15:53               | 2636            | 50                              | 34.72                       | 1.49                          | 1.48                       | 27.78                                        | AW                      |
| PS114_25-2                     | V3/8        | 78.830      | -0.025       | 2018-07-20   15:53               | 2636            | 10                              | 34.51                       | 4.62                          | 4.62                       | 27.33                                        | AW                      |
| <b>vertical profile 4 (V4)</b> |             |             |              |                                  |                 |                                 |                             |                               |                            |                                              |                         |
| PS114_43-2                     | V4/1        | 78.820      | -2.779       | 2018-07-26   14:32               | 2595            | 2600                            | 34.93                       | -0.73                         | -0.86                      | 28.09                                        | DW                      |
| PS114_43-2                     | V4/2        | 78.820      | -2.779       | 2018-07-26   14:32               | 2595            | 2000                            | 34.92                       | -0.62                         | -0.72                      | 28.08                                        | DW                      |
| PS114_43-2                     | V4/3        | 78.820      | -2.779       | 2018-07-26   14:32               | 2595            | 1200                            | 34.91                       | -0.26                         | -0.32                      | 28.05                                        | IW                      |
| PS114_43-2                     | V4/4        | 78.820      | -2.779       | 2018-07-26   14:32               | 2595            | 1000                            | 34.90                       | -0.10                         | -0.15                      | 28.03                                        | IW                      |

|            |       |        |        |            |       |      |     |       |       |       |       |         |
|------------|-------|--------|--------|------------|-------|------|-----|-------|-------|-------|-------|---------|
| PS114_43-2 | V4/5  | 78.820 | -2.779 | 2018-07-26 | 14:32 | 2595 | 700 | 34.88 | 0.21  | 0.18  | 28.00 | RAW/AAW |
| PS114_43-2 | V4/6  | 78.820 | -2.779 | 2018-07-26 | 14:32 | 2595 | 500 | 34.87 | 0.57  | 0.54  | 27.97 | RAW/AAW |
| PS114_43-4 | V4/7  | 78.818 | -2.769 | 2018-07-26 | 18:32 | 2598 | 250 | 34.91 | 1.77  | 1.75  | 27.92 | RAW/AAW |
| PS114_43-4 | V4/8  | 78.818 | -2.769 | 2018-07-26 | 18:32 | 2598 | 100 | 34.50 | 0.02  | 0.02  | 27.70 | PW      |
| PS114_43-4 | V4/9  | 78.818 | -2.769 | 2018-07-26 | 18:32 | 2598 | 75  | 34.23 | -1.01 | -1.02 | 27.53 | PW      |
| PS114_43-4 | V4/10 | 78.818 | -2.769 | 2018-07-26 | 18:32 | 2598 | 60  | 34.06 | -1.57 | -1.57 | 27.41 | PW      |
| PS114_43-4 | V4/11 | 78.818 | -2.769 | 2018-07-26 | 18:32 | 2598 | 40  | 33.92 | -1.40 | -1.40 | 27.30 | PW      |
| PS114_43-4 | V4/12 | 78.818 | -2.769 | 2018-07-26 | 18:32 | 2598 | 15  | 33.06 | -1.51 | -1.51 | 26.60 | PW      |
| PS114_43-4 | V4/13 | 78.818 | -2.769 | 2018-07-26 | 18:32 | 2598 | 5   | 30.24 | -0.69 | -0.69 | 24.29 | PW      |

**vertical profile 5 (V5)**

|            |      |        |        |            |       |      |     |       |       |       |       |         |
|------------|------|--------|--------|------------|-------|------|-----|-------|-------|-------|-------|---------|
| PS114_46-1 | V5/1 | 78.993 | -5.436 | 2018-07-27 | 07:16 | 997  | 959 | 34.89 | -0.02 | -0.06 | 28.02 | IW      |
| PS114_46-1 | V5/2 | 78.993 | -5.436 | 2018-07-27 | 07:16 | 997  | 500 | 34.87 | 0.54  | 0.52  | 27.97 | RAW/AAW |
| PS114_46-1 | V5/3 | 78.993 | -5.436 | 2018-07-27 | 07:16 | 997  | 250 | 34.84 | 1.00  | 0.99  | 27.92 | RAW/AAW |
| PS114_46-8 | V5/4 | 79.012 | -5.285 | 2018-07-27 | 15:45 | 1139 | 100 | 34.32 | -0.76 | -0.76 | 27.60 | PW      |
| PS114_46-8 | V5/5 | 79.012 | -5.285 | 2018-07-27 | 15:45 | 1139 | 75  | 33.98 | -1.33 | -1.33 | 27.34 | PW      |
| PS114_46-8 | V5/6 | 79.012 | -5.285 | 2018-07-27 | 15:45 | 1139 | 50  | 33.61 | -1.50 | -1.50 | 27.05 | PW      |
| PS114_46-8 | V5/7 | 79.012 | -5.285 | 2018-07-27 | 15:45 | 1139 | 26  | 33.17 | -1.59 | -1.59 | 26.69 | PW      |
| PS114_46-8 | V5/8 | 79.012 | -5.285 | 2018-07-27 | 15:45 | 1139 | 5   | 31.32 | -1.01 | -1.01 | 25.17 | PW      |

**vertical profile 6 (V6)**

|            |      |        |         |            |       |     |     |       |       |       |       |         |
|------------|------|--------|---------|------------|-------|-----|-----|-------|-------|-------|-------|---------|
| PS114_49-2 | V6/1 | 79.615 | -16.525 | 2018-07-28 | 20:34 | 281 | 271 | 34.81 | 0.96  | 0.95  | 27.89 | RAW/AAW |
| PS114_49-2 | V6/2 | 79.615 | -16.525 | 2018-07-28 | 20:34 | 281 | 150 | 34.42 | 0.44  | 0.43  | 27.61 | RAW/AAW |
| PS114_49-2 | V6/3 | 79.615 | -16.525 | 2018-07-28 | 20:34 | 281 | 100 | 33.68 | -0.89 | -0.89 | 27.08 | PW      |
| PS114_49-2 | V6/4 | 79.615 | -16.525 | 2018-07-28 | 20:34 | 281 | 50  | 31.70 | -1.68 | -1.68 | 25.50 | PW      |
| PS114_49-2 | V6/5 | 79.615 | -16.525 | 2018-07-28 | 20:34 | 281 | 10  | 31.25 | -1.53 | -1.53 | 25.12 | PW      |

**vertical profile 7 (V7)**

|            |      |        |        |            |       |      |      |       |       |       |       |         |
|------------|------|--------|--------|------------|-------|------|------|-------|-------|-------|-------|---------|
| PS114_36-2 | V7/1 | 80.855 | -0.140 | 2018-07-24 | 12:48 | 3181 | 3117 | 34.93 | -0.70 | -0.88 | 28.09 | DW      |
| PS114_36-2 | V7/2 | 80.855 | -0.140 | 2018-07-24 | 12:48 | 3181 | 2000 | 34.92 | -0.67 | -0.77 | 28.08 | DW      |
| PS114_36-2 | V7/3 | 80.855 | -0.140 | 2018-07-24 | 12:48 | 3181 | 1000 | 34.90 | -0.23 | -0.27 | 28.04 | IW      |
| PS114_36-2 | V7/4 | 80.855 | -0.140 | 2018-07-24 | 12:48 | 3181 | 500  | 34.90 | 0.99  | 0.97  | 27.97 | RAW/AAW |
| PS114_36-2 | V7/5 | 80.855 | -0.140 | 2018-07-24 | 12:48 | 3181 | 250  | 34.99 | 2.76  | 2.75  | 27.90 | RAW/AAW |
| PS114_36-2 | V7/6 | 80.855 | -0.140 | 2018-07-24 | 12:48 | 3181 | 100  | 34.73 | 1.13  | 1.13  | 27.82 | RAW/AAW |
| PS114_36-2 | V7/7 | 80.855 | -0.140 | 2018-07-24 | 12:48 | 3181 | 50   | 34.22 | -1.43 | -1.43 | 27.54 | PW      |
| PS114_36-2 | V7/8 | 80.855 | -0.140 | 2018-07-24 | 12:48 | 3181 | 10   | 33.28 | -1.51 | -1.51 | 26.77 | PW      |

<sup>1</sup> At the CTD/rosette stations, physicochemical data was recorded during the casts<sup>3</sup> and measured in water samples taken from the Niskin bottles mounted on the CTD rosette.<sup>4</sup>

Data shown here was taken from von Appen et al.<sup>4</sup>

<sup>2</sup> Event names were taken from the expedition report<sup>2</sup> and are structured as follows: cruise\_station\_cast.<sup>3</sup> $\theta$ : potential temperature; <sup>4</sup> $\sigma_0$ : potential density referenced to sea surface

<sup>5</sup> Water masses were classified according to Rudels et al.<sup>5</sup>, based on measured physicochemical parameters (see Table S21 for further explanation).

**Table S3: Overview of analytical standards, CAS numbers, the standard suppliers, purity and concentration/amount.**

| acronym <sup>1</sup> | analytical standard                                                                                                   | CAS number <sup>2</sup>                                                   | supplier, purity and concentration/amount <sup>3</sup> |
|----------------------|-----------------------------------------------------------------------------------------------------------------------|---------------------------------------------------------------------------|--------------------------------------------------------|
| PFBA                 | perfluoro- <i>n</i> -butanoic acid                                                                                    | 375-22-4 (acid)                                                           |                                                        |
| PFPeA                | perfluoro- <i>n</i> -pentanoic acid                                                                                   | 2706-90-3 (acid)                                                          |                                                        |
| PFHxA                | perfluoro- <i>n</i> -hexanoic acid                                                                                    | 307-24-4 (acid)                                                           |                                                        |
| PFHpA                | perfluoro- <i>n</i> -heptanoic acid                                                                                   | 375-85-9 (acid)                                                           | PFC-MXA (mixture)                                      |
| PFOA                 | perfluoro- <i>n</i> -octanoic acid                                                                                    | 335-67-1 (acid)                                                           | Wellington Laboratories,<br>> 98 %                     |
| PFNA                 | perfluoro- <i>n</i> -nonanoic acid                                                                                    | 375-95-1 (acid)                                                           |                                                        |
| PFDA                 | perfluoro- <i>n</i> -decanoic acid                                                                                    | 335-76-2 (acid)                                                           | 2.0 µg/mL ± 5 %                                        |
| PFUnDA               | perfluoro- <i>n</i> -undecanoic acid                                                                                  | 2058-94-8 (acid)                                                          | of the single compounds                                |
| PFDoDA               | perfluoro- <i>n</i> -dodecanoic acid                                                                                  | 307-55-1 (acid)                                                           |                                                        |
| PFTTrDA              | perfluoro- <i>n</i> -tridecanoic acid                                                                                 | 72629-94-8 (acid)                                                         |                                                        |
| PFTeDA               | perfluoro- <i>n</i> -tetradecanoic acid                                                                               | 376-06-7 (acid)                                                           |                                                        |
| PFBS                 | potassium perfluoro- <i>n</i> -butanesulfonate                                                                        | 29420-49-3 (K <sup>+</sup> salt)<br>375-73-5 (acid)                       |                                                        |
| PFHxS                | sodium perfluoro- <i>n</i> -hexanesulfonate                                                                           | 82382-12-5 (Na <sup>+</sup> salt)<br>355-46-4 (acid)                      | PFS-MXA (mixture)                                      |
| PFHpS                | sodium perfluoro- <i>n</i> -heptanesulfonate                                                                          | 22767-50-6 (Na <sup>+</sup> salt)<br>375-92-8 (acid)                      | Wellington Laboratories,<br>> 98 %                     |
| PFOS                 | sodium perfluoro- <i>n</i> -octanesulfonate                                                                           | 4021-47-0 (Na <sup>+</sup> salt)<br>1763-23-1 (acid)                      | 2.0 µg/mL ± 5 %                                        |
| PFDS                 | sodium perfluoro- <i>n</i> -decanesulfonate                                                                           | 2806-15-7 (Na <sup>+</sup> salt)<br>335-77-3 (acid)                       | of the single compounds                                |
| PFECHS               | potassium perfluoro-4-ethylcyclohexane-sulfonate (isomeric mixture <i>cis/trans</i> 1:3)                              | 335-24-0 (K <sup>+</sup> salt)<br>646-83-3 (acid)                         | Wellington Laboratories,<br>> 98 %, (50 ± 2.5) µg/mL   |
| DONA                 | sodium 2,2,3-trifluoro-3-[1,1,2,2,3,3-hexafluoro-3-(trifluoromethoxy)propoxy]-propionate                              | 958445-44-8 (Na <sup>+</sup> salt)<br>919005-14-4 (acid)                  | Wellington Laboratories,<br>> 98 %, (50 ± 2.5) µg/mL   |
| HFPO-DA              | 2,3,3,3-tetrafluoro-2-(1,1,2,2,3,3,3-heptafluoropropoxy)propanoic acid                                                | 13252-13-6 (acid)<br>62037-80-3 (NH <sub>4</sub> <sup>+</sup> salt, GenX) | Wellington Laboratories,<br>> 98 %, (50 ± 2.5) µg/mL   |
| HFPO-TrA             | 2,3,3,3-tetrafluoro-2-[1,1,2,2,3,3,3-hexafluoro-2-(1,1,2,2,3,3,3-heptafluoropropoxy)propoxy]-propanoic acid           | 13252-14-7 (acid)                                                         | ABCR, 95 %, 5 g                                        |
| HFPO-TeA             | 2,3,3,3-tetrafluoro-2-[1,1,2,2,3,3,3-hexafluoro-2-(1,1,2,2,3,3,3-heptafluoropropoxy)propoxy]propanoic acid            | 65294-16-8 (acid)                                                         | Apollo Scientific, 98 %, 5 g                           |
| 6:2 Cl-PFESA         | potassium 2-[(6-chloro-1,1,2,2,3,3,3,4,4,5,5,6,6-dodecafluorohexyl)oxy]-1,1,2,2-tetrafluoroethanesulfonate            | 73606-19-6 (K <sup>+</sup> salt)<br>756426-58-1 (acid)                    | Wellington Laboratories,<br>> 98 %, (50 ± 2.5) µg/mL   |
| 8:2 Cl-PFESA         | potassium 2-[(8-Chloro-1,1,2,2,3,3,3,4,4,5,5,6,-6,7,7,8,8-hexadecafluorooctyl)oxy]-1,1,2,2-tetrafluoroethanesulfonate | 83329-89-9 (K <sup>+</sup> salt)                                          | Wellington Laboratories,<br>> 98 %, (50 ± 2.5) µg/mL   |
| 6:6 PFPiA            | sodium bis(perfluorohexyl)phosphinate                                                                                 | 70609-44-8 (Na <sup>+</sup> salt)<br>40143-77-9 (acid)                    | Wellington Laboratories,<br>> 98 %, (50 ± 2.5) µg/mL   |
| 6:8 PFPiA            | sodium perfluorohexylperfluorooctylphosphinate                                                                        | 610800-34-5 (acid)                                                        | Wellington Laboratories,<br>> 98 %, (50 ± 2.5) µg/mL   |
| FOSA                 | perfluorooctane sulfonamide                                                                                           | 754-91-6                                                                  | Wellington Laboratories,<br>> 98 %, (50 ± 2.5) µg/mL   |
| 4:2 FTSA             | sodium 4:2 fluorotelomer sulfonate                                                                                    | 757124-72-4 (acid)                                                        | Wellington Laboratories,                               |



|                                       |                                                                                                          |                                                        |                                                                                                              |
|---------------------------------------|----------------------------------------------------------------------------------------------------------|--------------------------------------------------------|--------------------------------------------------------------------------------------------------------------|
| 6:2 FTSA                              | sodium 6:2 fluorotelomer sulfonate                                                                       | 27619-94-9 (Na <sup>+</sup> salt)<br>27619-97-2 (acid) | > 98 %, (50 ± 2.5) µg/mL<br>Wellington Laboratories,<br>> 98 %, (50 ± 2.5) µg/mL<br>Wellington Laboratories, |
| 8:2 FTSA                              | sodium 8:2 fluorotelomer sulfonate                                                                       | 39108-34-4 (acid)                                      | > 98 %, (50 ± 2.5) µg/mL                                                                                     |
| <sup>13</sup> C <sub>4</sub> -PFBA    | perfluoro- <i>n</i> -[ <sup>13</sup> C <sub>4</sub> ]-butanoic acid                                      | -                                                      |                                                                                                              |
| <sup>13</sup> C <sub>2</sub> -PFHxA   | perfluoro- <i>n</i> -[1,2- <sup>13</sup> C <sub>2</sub> ]-hexanoic acid                                  | -                                                      |                                                                                                              |
| <sup>13</sup> C <sub>4</sub> -PFOA    | perfluoro- <i>n</i> -[1,2,3,4- <sup>13</sup> C <sub>4</sub> ]-octanoic acid                              | -                                                      |                                                                                                              |
| <sup>13</sup> C <sub>5</sub> -PFNA    | perfluoro- <i>n</i> -[1,2,3,4,5- <sup>13</sup> C <sub>5</sub> ]-nonanoic acid                            | -                                                      | MPFAC-MXA (mixture)                                                                                          |
| <sup>13</sup> C <sub>2</sub> -PFDA    | perfluoro- <i>n</i> -[1,2- <sup>13</sup> C <sub>2</sub> ]-decanoic acid                                  | -                                                      | Wellington Laboratories,                                                                                     |
| <sup>13</sup> C <sub>2</sub> -PFUnDA  | perfluoro- <i>n</i> -[1,2- <sup>13</sup> C <sub>2</sub> ]-undecanoic acid                                | -                                                      | > 98 %, 2.0 µg/mL ± 5 %<br>of the single compounds                                                           |
| <sup>13</sup> C <sub>2</sub> -PFDoDA  | perfluoro- <i>n</i> -[1,2- <sup>13</sup> C <sub>2</sub> ]-dodecanoic acid                                | -                                                      |                                                                                                              |
| <sup>18</sup> O <sub>2</sub> -PFHxS   | sodium perfluorohexane- <i>n</i> -[ <sup>18</sup> O <sub>2</sub> ]-sulfonate                             | -                                                      |                                                                                                              |
| <sup>13</sup> C <sub>4</sub> -PFOS    | sodium perfluoro- <i>n</i> -[1,2,3,4- <sup>13</sup> C <sub>4</sub> ]-octanesulfo-nate                    | -                                                      |                                                                                                              |
| <sup>13</sup> C <sub>3</sub> -HFPO-DA | 2,3,3,3-tetrafluoro-2-(1,1,2,2,3,3,3-heptafluoropropoxy)-[ <sup>13</sup> C <sub>3</sub> ]-propanoic acid | -                                                      | Wellington Laboratories,<br>> 98 %, (50 ± 2.5) µg/mL                                                         |
| <sup>13</sup> C <sub>8</sub> -PFOA    | perfluoro-[ <sup>13</sup> C <sub>8</sub> ]-octanoic acid (injection standard)                            | -                                                      | Wellington Laboratories,<br>> 98 %, (50 ± 2.5) µg/mL                                                         |

<sup>1</sup> The standards are prepared from salts or the free acid (see column 2), whereas the measured form of the target analyte is the anion. The acronyms are used for all three forms. To name the compounds, the nomenclature proposed by Buck et al. was followed, where applicable.<sup>6</sup> For emerging PFASs, commonly used acronyms were used and the IUPAC names for the respective compounds are given in column 2 of the table.

<sup>2</sup> If standards are provided as dissolved salts, the CAS number of the salt and the free acid counterpart is given (if available).

<sup>3</sup> Given concentrations refer to the salts.

**Table S4: Chemicals used for sample preparation and cleaning.**

| chemical              | specification by supplier                        | supplier             |
|-----------------------|--------------------------------------------------|----------------------|
| methanol              | for liquid chromatography, LiChrosolv            | Merck, Germany       |
| ultrapure water       | supplied by Milli-Q Integral 5 system            | Merck, Germany       |
| acetic acid           | ≥ 99.8% eluent additive, for LC-MS               | Honeywell Fluka, USA |
| ammonium acetate      | for mass spectrometry, eluent additive for LC-MS | Merck, Germany       |
| ammonia solution 25 % | Suprapur                                         | Merck, Germany       |

## Section S1: Sample extraction

Solid phase extraction for 1 L samples was performed as described previously.<sup>7</sup> Weak anion exchange cartridges (Oasis WAX, 6 cc, 500 mg sorbent, 60 µm particle size, Waters, USA) were preconditioned by 6 mL 0.1% ammonium hydroxide in methanol, 6 mL methanol and 6 mL water. An internal standard mix was added to the samples (400 pg of each standard) before they were loaded onto the cartridges. A washing step using an 80:20 (v/v) water/methanol solution followed.<sup>8</sup> To remove matrix components, especially sea salt, and to improve recovery rates for long-chain PFASs, a comparatively large volume of 15 mL of the washing solution was used per sample. After vacuum drying of the cartridges and storage at -20 °C, the target compounds were eluted using 6 mL methanol and 6 mL 0.1% ammonium hydroxide in methanol. Subsequently, the combined fractions were reduced to 150 µL under nitrogen. Before the measurement, 40 µL water (20 % v/v) as well as 400 pg of the injection standard <sup>13</sup>C<sub>8</sub>-PFOA (10 µL of a 40 pg/µL solution) were added to the sample.

**Table S5: LC parameters and MS/MS parameters of the instrumental method for PFAS analysis.**

| LC parameters         |                                                                                                         |       |       |               |
|-----------------------|---------------------------------------------------------------------------------------------------------|-------|-------|---------------|
| instrument            | HP 1100 (Agilent Technologies, USA)                                                                     |       |       |               |
| analytical column     | Synergi Fusion-RP C <sub>18</sub> , 150 mm x 2 mm, particle size 4 µm, pore size 80 Å (Phenomenex, USA) |       |       |               |
| guard column          | SecurityGuard cartridge for Fusion-RP LC columns, 4 mm x 2 mm (Phenomenex, USA)                         |       |       |               |
| injection volume      | 10 µL (needle rinsed twice with methanol before injection)                                              |       |       |               |
| column temperature    | 30 °C                                                                                                   |       |       |               |
| flow rate             | 0.2 mL/min                                                                                              |       |       |               |
| mobile phases         | A: 2 mM ammonium acetate aqueous solution<br>B: 0.05 % acetic acid in methanol                          |       |       |               |
| gradient              | Time [min]                                                                                              | A [%] | B [%] | note          |
|                       | -8                                                                                                      | 70    | 30    | equilibration |
|                       | 0                                                                                                       | 70    | 30    |               |
|                       | 3                                                                                                       | 30    | 70    |               |
|                       | 29                                                                                                      | 10    | 90    |               |
|                       | 31                                                                                                      | 0     | 100   | purging       |
|                       | 45                                                                                                      | 0     | 100   |               |
| MS/MS parameters      |                                                                                                         |       |       |               |
| instrument            | API 4000 triple quadrupole mass spectrometer (AB Sciex, USA)                                            |       |       |               |
| ion source            | Turbo V Ion Source (AB Sciex, USA)                                                                      |       |       |               |
| ionization            | electrospray ionization (ESI) in negative mode                                                          |       |       |               |
| ion spray voltage     | -4500 V                                                                                                 |       |       |               |
| source temperature    | 400 °C                                                                                                  |       |       |               |
| gas 1 (nebulizer gas) | N <sub>2</sub> , 4.2 bar                                                                                |       |       |               |
| gas 2 (heater gas)    | N <sub>2</sub> , 2.8 bar                                                                                |       |       |               |
| curtain gas           | N <sub>2</sub> , 1.0 bar                                                                                |       |       |               |
| collision gas         | N <sub>2</sub> , 0.6 bar                                                                                |       |       |               |
| scan type             | Scheduled Multiple Reaction Monitoring (MRM)                                                            |       |       |               |
|                       | retention time window: 180 s, target scan time: 2 s                                                     |       |       |               |

**Table S6: Retention times, precursor ion, monitored mass transitions, transition-specific parameters and corresponding internal standards used for quantification of the target analytes.**

| acronym<br>analyte                  | tr <sup>1</sup> [min] | molecular formula<br>precursor ion                                                                        | monitored mass<br>transition<br>s <sup>2</sup> [m/z] | transition-specific parameters [V] |                 |                 |                  | internal<br>standard <sup>7</sup>      |
|-------------------------------------|-----------------------|-----------------------------------------------------------------------------------------------------------|------------------------------------------------------|------------------------------------|-----------------|-----------------|------------------|----------------------------------------|
|                                     |                       |                                                                                                           |                                                      | DP <sup>3</sup>                    | EP <sup>4</sup> | CE <sup>5</sup> | CXP <sup>6</sup> |                                        |
| PFBA                                | 10.1                  | [C <sub>4</sub> F <sub>7</sub> O <sub>2</sub> ] <sup>-</sup>                                              | 213>169*                                             | -30                                | -5              | -13             | -9               | <sup>13</sup> C <sub>4</sub> -PFBA     |
| PFPeA                               | 11.9                  | [C <sub>5</sub> F <sub>9</sub> O <sub>2</sub> ] <sup>-</sup>                                              | 263>219*                                             | -26                                | -4              | -12             | -13              | <sup>13</sup> C <sub>2</sub> -PFHxA    |
| PFHxA                               | 13.4                  | [C <sub>6</sub> F <sub>11</sub> O <sub>2</sub> ] <sup>-</sup>                                             | 313>269*                                             | -28                                | -4              | -13             | -16              | <sup>13</sup> C <sub>2</sub> -PFHxA    |
|                                     |                       |                                                                                                           | 313>119                                              | -28                                | -4              | -30             | -5               |                                        |
| PFHpA                               | 15.1                  | [C <sub>7</sub> F <sub>13</sub> O <sub>2</sub> ] <sup>-</sup>                                             | 363>319                                              | -29                                | -4              | -14             | -19              | <sup>13</sup> C <sub>4</sub> -PFOA     |
|                                     |                       |                                                                                                           | 363>169*                                             | -29                                | -4              | -25             | -8               |                                        |
| PFOA                                | 17.1                  | [C <sub>8</sub> F <sub>15</sub> O <sub>2</sub> ] <sup>-</sup>                                             | 413>369*                                             | -24                                | -4              | -15             | -8               | <sup>13</sup> C <sub>4</sub> -PFOA     |
|                                     |                       |                                                                                                           | 413>169                                              | -24                                | -4              | -28             | -8               |                                        |
| PFNA                                | 19.7                  | [C <sub>9</sub> F <sub>17</sub> O <sub>2</sub> ] <sup>-</sup>                                             | 463>419*                                             | -34                                | -4              | -15             | -9               | <sup>13</sup> C <sub>5</sub> -PFNA     |
|                                     |                       |                                                                                                           | 463>219                                              | -34                                | -4              | -24             | -12              |                                        |
| PFDA                                | 22.6                  | [C <sub>10</sub> F <sub>19</sub> O <sub>2</sub> ] <sup>-</sup>                                            | 513>469*                                             | -35                                | -6              | -15             | -11              | <sup>13</sup> C <sub>2</sub> -PFDA     |
|                                     |                       |                                                                                                           | 513>219                                              | -35                                | -6              | -29             | -12              |                                        |
| PFUnDA                              | 25.6                  | [C <sub>11</sub> F <sub>21</sub> O <sub>2</sub> ] <sup>-</sup>                                            | 563>519*                                             | -35                                | -5              | -17             | -13              | <sup>13</sup> C <sub>2</sub> -PFUnDA   |
|                                     |                       |                                                                                                           | 563>169                                              | -35                                | -5              | -37             | -8               |                                        |
| PFDoDA                              | 28.7                  | [C <sub>12</sub> F <sub>23</sub> O <sub>2</sub> ] <sup>-</sup>                                            | 613>569*                                             | -38                                | -9              | -17             | -15              | <sup>13</sup> C <sub>2</sub> -PFDoDA   |
|                                     |                       |                                                                                                           | 613>169                                              | -38                                | -9              | -38             | -8               |                                        |
| PFTTrDA                             | 31.7                  | [C <sub>13</sub> F <sub>25</sub> O <sub>2</sub> ] <sup>-</sup>                                            | 663>619*                                             | -39                                | -8              | -18             | -14              | <sup>13</sup> C <sub>2</sub> -PFDoDA   |
|                                     |                       |                                                                                                           | 663>169                                              | -39                                | -8              | -41             | -8               |                                        |
| PFTeDA                              | 34.6                  | [C <sub>14</sub> F <sub>27</sub> O <sub>2</sub> ] <sup>-</sup>                                            | 713>669*                                             | -36                                | -9              | -22             | -15              | <sup>13</sup> C <sub>2</sub> -PFDoDA   |
|                                     |                       |                                                                                                           | 713>169                                              | -36                                | -9              | -40             | -8               |                                        |
| PFBS                                | 12.0                  | [C <sub>4</sub> F <sub>9</sub> O <sub>3</sub> S] <sup>-</sup>                                             | 299>99                                               | -66                                | -12             | -42             | -16              | <sup>18</sup> O <sub>2</sub> -PFHxS    |
|                                     |                       |                                                                                                           | 299>80*                                              | -66                                | -12             | -60             | -2               |                                        |
| PFHxS                               | 15.0                  | [C <sub>6</sub> F <sub>13</sub> O <sub>3</sub> S] <sup>-</sup>                                            | 399>99                                               | -70                                | -14             | -50             | -15              | <sup>18</sup> O <sub>2</sub> -PFHxS    |
|                                     |                       |                                                                                                           | 399>80*                                              | -70                                | -14             | -66             | -2               |                                        |
| PFHpS                               | 17.0                  | [C <sub>7</sub> F <sub>15</sub> O <sub>3</sub> S] <sup>-</sup>                                            | 449>99                                               | -80                                | -12             | -61             | -16              | <sup>13</sup> C <sub>4</sub> -PFOS     |
|                                     |                       |                                                                                                           | 449>80*                                              | -80                                | -12             | -85             | -2               |                                        |
| L-PFOS                              | 19.5                  | [C <sub>8</sub> F <sub>17</sub> O <sub>3</sub> S] <sup>-</sup>                                            | 499>99                                               | -73                                | -12             | -74             | -17              | <sup>13</sup> C <sub>4</sub> -PFOS     |
|                                     |                       |                                                                                                           | 499>80*                                              | -73                                | -12             | -90             | -2               |                                        |
| Br-PFOS                             | 18.7/18.4             | [C <sub>8</sub> F <sub>17</sub> O <sub>3</sub> S] <sup>-</sup>                                            | 499>99                                               | -73                                | -12             | -74             | -17              | <sup>13</sup> C <sub>4</sub> -PFOS     |
|                                     |                       |                                                                                                           | 499>80*                                              | -73                                | -12             | -90             | -2               |                                        |
| PFDS                                | 25.3                  | [C <sub>10</sub> F <sub>21</sub> O <sub>3</sub> S] <sup>-</sup>                                           | 599>99                                               | -80                                | -14             | -62             | -3               | <sup>13</sup> C <sub>4</sub> -PFOS     |
|                                     |                       |                                                                                                           | 599>80*                                              | -80                                | -14             | -90             | -2               |                                        |
| PFECHS                              | 16.7                  | [C <sub>8</sub> F <sub>15</sub> O <sub>3</sub> S] <sup>-</sup>                                            | 461>381*                                             | -60                                | -10             | -40             | -20              | <sup>18</sup> O <sub>2</sub> -PFHxS    |
|                                     |                       |                                                                                                           | 461>99                                               | -60                                | -10             | -55             | -4               |                                        |
| DONA                                | 15.1                  | [C <sub>7</sub> HF <sub>12</sub> O <sub>4</sub> ] <sup>-</sup>                                            | 377>251*                                             | -33                                | -6              | -22             | -16              | <sup>13</sup> C <sub>4</sub> -PFOA     |
|                                     |                       |                                                                                                           | 377>85                                               | -33                                | -6              | -50             | -14              |                                        |
| HFPO-DA                             | 14.0                  | [C <sub>6</sub> F <sub>11</sub> O <sub>3</sub> ] <sup>-</sup>                                             | 329>285                                              | -22                                | -4              | -7              | -18              | <sup>13</sup> C <sub>3</sub> -HFPO-DA  |
|                                     |                       |                                                                                                           | 329>169*                                             | -22                                | -4              | -18             | -8               |                                        |
| HFPO-TrA                            | 20.7                  | [C <sub>9</sub> F <sub>17</sub> O <sub>4</sub> ] <sup>-</sup>                                             | 495>185*                                             | -15                                | -4              | -9              | -12              | <sup>13</sup> C <sub>2</sub> -PFDA     |
| HFPO-TeA                            | 28.3                  | [C <sub>12</sub> F <sub>23</sub> O <sub>5</sub> ] <sup>-</sup>                                            | 661>351*                                             | -8                                 | -8              | -8              | -2               | <sup>13</sup> C <sub>2</sub> -PFDoDA   |
|                                     |                       |                                                                                                           | 661>185                                              | -30                                | -4              | -45             | -14              |                                        |
| 6:2 Cl-PFESA                        | 20.9                  | [C <sub>8</sub> ClF <sub>16</sub> O <sub>4</sub> S] <sup>-</sup>                                          | 531>351*                                             | -60                                | -14             | -39             | -20              | <sup>13</sup> C <sub>4</sub> -PFOS     |
|                                     |                       |                                                                                                           | 531>83                                               | -60                                | -14             | -61             | -14              |                                        |
| 8:2 Cl-PFESA                        | 26.8                  | [C <sub>10</sub> ClF <sub>20</sub> O <sub>4</sub> S] <sup>-</sup>                                         | 631>451*                                             | -75                                | -13             | -44             | -20              | <sup>13</sup> C <sub>4</sub> -PFOS     |
|                                     |                       |                                                                                                           | 631>83                                               | -75                                | -13             | -82             | -2               |                                        |
| 6:6 PFPiA                           | 29.5                  | [C <sub>12</sub> F <sub>26</sub> O <sub>2</sub> P] <sup>-</sup>                                           | 701>401*                                             | -75                                | -8              | -77             | -16              | -                                      |
|                                     |                       |                                                                                                           | 701>63                                               | -75                                | -8              | -89             | -10              |                                        |
| 6:8 PFPiA                           | 34.1                  | [C <sub>14</sub> F <sub>30</sub> O <sub>2</sub> P] <sup>-</sup>                                           | 801>501*                                             | -57                                | -11             | -83             | -20              | -                                      |
|                                     |                       |                                                                                                           | 801>401                                              | -57                                | -11             | -82             | -18              |                                        |
| L-FOSA                              | 20.9                  | [C <sub>8</sub> HF <sub>17</sub> NO <sub>2</sub> S] <sup>-</sup>                                          | 498>78*                                              | -84                                | -10             | -69             | -2               | <sup>13</sup> C <sub>8</sub> -FOSA     |
| Br-FOSA                             | 19.5/19.9             | [C <sub>8</sub> HF <sub>17</sub> NO <sub>2</sub> S] <sup>-</sup>                                          | 498>78*                                              | -84                                | -10             | -69             | -2               | <sup>13</sup> C <sub>8</sub> -FOSA     |
| 4:2 FTSA                            | 13.0                  | [C <sub>6</sub> H <sub>4</sub> F <sub>9</sub> O <sub>3</sub> S] <sup>-</sup>                              | 327>307                                              | -60                                | -10             | -28             | -18              | <sup>13</sup> C <sub>2</sub> -6:2 FTSA |
|                                     |                       |                                                                                                           | 327>81*                                              | -60                                | -10             | -48             | -2               |                                        |
| 6:2 FTSA                            | 16.7                  | [C <sub>8</sub> H <sub>4</sub> F <sub>13</sub> O <sub>3</sub> S] <sup>-</sup>                             | 427>407                                              | -70                                | -13             | -34             | -20              | <sup>13</sup> C <sub>2</sub> -6:2 FTSA |
|                                     |                       |                                                                                                           | 427>81*                                              | -70                                | -13             | -68             | -2               |                                        |
| 8:2 FTSA                            | 22.2                  | [C <sub>10</sub> H <sub>4</sub> F <sub>17</sub> O <sub>3</sub> S] <sup>-</sup>                            | 527>507                                              | -80                                | -14             | -40             | -20              | <sup>13</sup> C <sub>2</sub> -6:2 FTSA |
|                                     |                       |                                                                                                           | 527>81*                                              | -80                                | -14             | -76             | -2               |                                        |
| <sup>13</sup> C <sub>4</sub> -PFBA  | 10.1                  | [ <sup>13</sup> C <sub>4</sub> F <sub>7</sub> O <sub>2</sub> ] <sup>-</sup>                               | 217>172*                                             | -22                                | -4              | -13             | -9               |                                        |
| <sup>13</sup> C <sub>2</sub> -PFHxA | 13.4                  | [ <sup>13</sup> C <sub>2</sub> <sup>12</sup> C <sub>4</sub> F <sub>11</sub> O <sub>2</sub> ] <sup>-</sup> | 315>270*                                             | -23                                | -6              | -12             | -16              |                                        |
|                                     |                       |                                                                                                           | 315>120                                              | -23                                | -6              | -31             | -4               |                                        |

|                                                 |      |                                                                                                            |          |     |     |     |     |
|-------------------------------------------------|------|------------------------------------------------------------------------------------------------------------|----------|-----|-----|-----|-----|
| <sup>13</sup> C <sub>4</sub> -PFOA              | 17.1 | [ <sup>13</sup> C <sub>4</sub> <sup>12</sup> C <sub>4</sub> F <sub>15</sub> O <sub>2</sub> ] <sup>-</sup>  | 417>372* | -32 | -4  | -13 | -8  |
|                                                 |      |                                                                                                            | 417>169  | -32 | -4  | -27 | -8  |
| <sup>13</sup> C <sub>8</sub> -PFOA <sup>8</sup> | 17.1 | [ <sup>13</sup> C <sub>8</sub> F <sub>15</sub> O <sub>2</sub> ] <sup>-</sup>                               | 421>376* | -25 | -6  | -14 | -8  |
|                                                 |      |                                                                                                            | 421>172  | -25 | -6  | -26 | -8  |
| <sup>13</sup> C <sub>5</sub> -PFNA              | 19.7 | [ <sup>13</sup> C <sub>5</sub> <sup>12</sup> C <sub>4</sub> F <sub>17</sub> O <sub>2</sub> ] <sup>-</sup>  | 468>423* | -30 | -7  | -14 | -10 |
|                                                 |      |                                                                                                            | 468>223  | -30 | -7  | -24 | -12 |
| <sup>13</sup> C <sub>2</sub> -PFDA              | 22.6 | [ <sup>13</sup> C <sub>2</sub> <sup>12</sup> C <sub>8</sub> F <sub>19</sub> O <sub>2</sub> ] <sup>-</sup>  | 515>470* | -39 | -6  | -16 | -10 |
|                                                 |      |                                                                                                            | 515>220  | -39 | -6  | -26 | -12 |
| <sup>13</sup> C <sub>2</sub> -PFUnDA            | 25.6 | [ <sup>13</sup> C <sub>2</sub> <sup>12</sup> C <sub>9</sub> F <sub>21</sub> O <sub>2</sub> ] <sup>-</sup>  | 565>520* | -33 | -6  | -16 | -13 |
|                                                 |      |                                                                                                            | 565>169  | -33 | -6  | -34 | -8  |
| <sup>13</sup> C <sub>2</sub> -PFDoDA            | 28.7 | [ <sup>13</sup> C <sub>2</sub> <sup>12</sup> C <sub>10</sub> F <sub>23</sub> O <sub>2</sub> ] <sup>-</sup> | 615>570* | -38 | -9  | -17 | -15 |
|                                                 |      |                                                                                                            | 615>169  | -38 | -9  | -41 | -8  |
| <sup>18</sup> O <sub>2</sub> -PFHxS             | 15.0 | [C <sub>6</sub> F <sub>13</sub> <sup>18</sup> O <sub>2</sub> <sup>16</sup> OS] <sup>-</sup>                | 403>103  | -82 | -10 | -55 | -4  |
|                                                 |      |                                                                                                            | 403>84*  | -82 | -10 | -79 | -2  |
| <sup>13</sup> C <sub>4</sub> -PFOS              | 19.5 | [ <sup>13</sup> C <sub>4</sub> <sup>12</sup> C <sub>4</sub> F <sub>17</sub> O <sub>3</sub> S] <sup>-</sup> | 503>99   | -65 | -12 | -64 | -4  |
|                                                 |      |                                                                                                            | 503>80*  | -65 | -12 | -92 | -2  |
| <sup>13</sup> C <sub>3</sub> -HFPO-DA           | 14.0 | [ <sup>13</sup> C <sub>3</sub> <sup>12</sup> C <sub>3</sub> F <sub>11</sub> O <sub>3</sub> ] <sup>-</sup>  | 332>287  | -21 | -3  | -7  | -14 |
|                                                 |      |                                                                                                            | 332>169* | -21 | -3  | -23 | -8  |

<sup>1</sup> t<sub>R</sub>: retention time

<sup>2</sup> Asterisks mark the product ion which was used as quantifier, whereas the second product ion was used as qualifier. The most intense ion was taken as quantifier except for HFPO-DA and PFHpA. For these compounds, the product ion with the second highest intensity was taken for quantification because of matrix interferences, which affected the first mass transition. For PFBA, PFPeA and FOSA, only one mass transition was monitored because product ion scans showed the generation of only one product ion with a high enough intensity. This is consistent with literature.<sup>8-9</sup>

<sup>3</sup>DP: declustering potential, <sup>4</sup>EP: entrance potential, <sup>5</sup>CE: collision energy, <sup>6</sup>CXP: cell exit potential

<sup>7</sup> The column lists the internal standards used for quantification of the compounds.

<sup>8</sup> <sup>13</sup>C<sub>8</sub>-PFOA was added as injection standard.

## **Section S2: Quantification of the target analytes**

The internal standard method was used for quantification, based on a 11-point calibration curve ranging from 0 to 10 pg/ $\mu$ L. Standards were prepared in 80:20 (v/v) methanol/water. A 1/x weighting factor was applied to improve accuracy for the low concentration region of the curve. All reported results were calculated on anion basis, i.e. corrected for the molecular weight of the salts, which were used to prepare the standard solutions.

Both the linear isomer of PFOS (L-PFOS) and the branched isomers (Br-PFOS) were detected in the samples. As their peaks were baseline-separated, L-PFOS and Br-PFOS were quantified individually against the linear calibration standard (mass transition  $m/z$  499 $\rightarrow$ 80).

For most of the PFCAs and PFSAAs, isotopically analogues were available, whereas only  $^{13}\text{C}_3$ -HFPO-DA could be obtained to quantify emerging substances from other groups of PFASs. To assign substances without isotopically labelled analogues to structurally similar internal standards, the results from matrix spike recovery tests were used. The internal standards which were used for quantification of the compounds are given in Table S6.

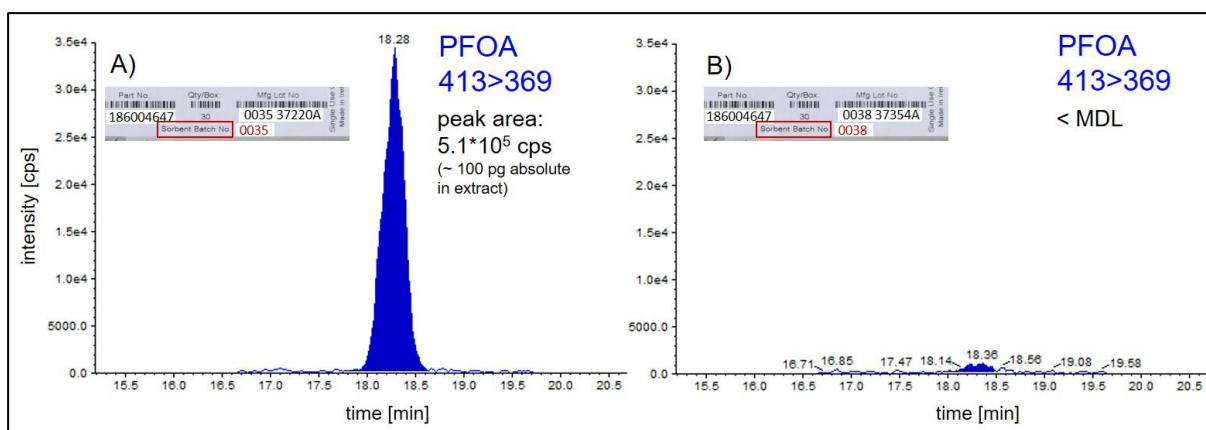

**Figure S2: LC-MS/MS chromatograms of PFOA showing differences in contamination between cartridges of the same manufacturer and part number, packed with different WAX resin sorbent batches, 0035 (A) and 0038 (B).** Cartridges were preconditioned with 6 mL 0.1 % NH<sub>4</sub>OH in methanol and 6 mL methanol. Then, 6 mL methanol and 6 mL 0.1 % NH<sub>4</sub>OH in methanol were added as for the elution of the target compounds and the eluates were collected. They were reduced to 200  $\mu$ L and analyzed by LC-MS/MS. The peak area of PFOA in A) was comparable to a 0.5  $\mu$ g/ $\mu$ L calibration standard, which contains 100  $\mu$ g PFOA absolute. The different WAX resin sorbent batches were tested before the cruise and only cartridges packed with sorbent lots for which tests showed no contamination with PFOA were used for extraction.

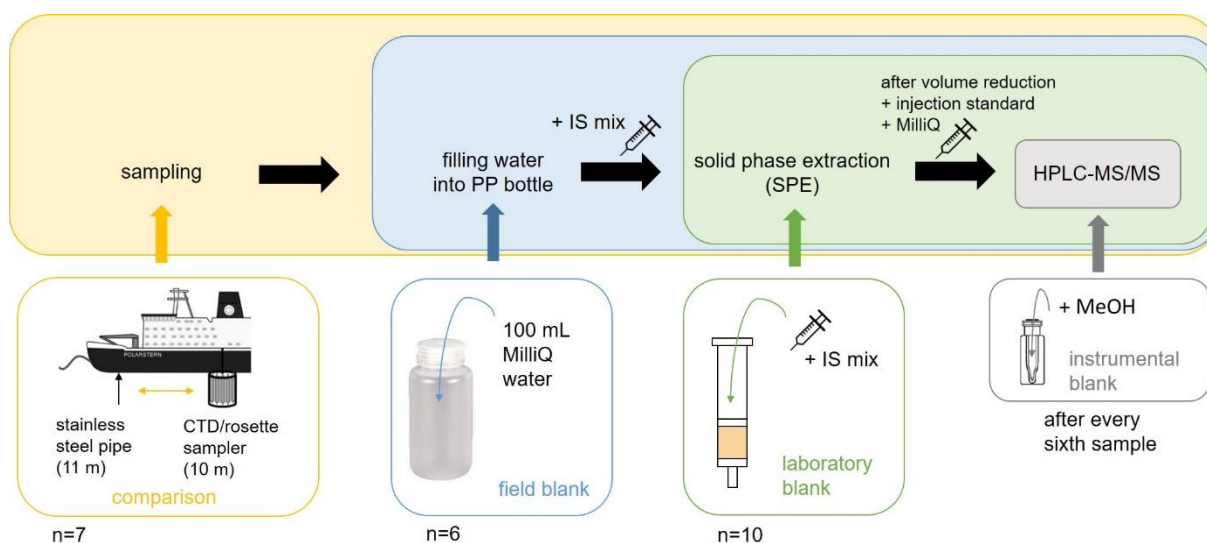

**Figure S3: Preparation and analysis of blank samples.** Methanol was injected as instrumental blank after every sixth sample in a measurement sequence. On board, one laboratory blank was prepared with every SPE batch by adding the IS mix to a preconditioned cartridge, leaving the cartridge on the vacuum manifold during the extraction and treating it as if it was a sample from the washing step on (n=10). In addition, six field blanks were prepared on different sampling days by filling a sampling bottle with 100 mL of pretested MilliQ water and analyzing it like a field sample. When surface water samples were taken with the CTD/rosette sampler (10 m depth), a sample was taken with the stainless steel pipe (11 m depth) at the same time to compare the two sampling techniques (n=7).

**Table S7: Mean concentrations of PFASs in procedural blanks ± standard deviation (SD), method detection limits (MDLs) and method quantification limits (MQLs).**

| analyte           | laboratory blanks (n=10) | field blanks (n=6) | MDL <sup>2</sup> | MQL <sup>2</sup> |
|-------------------|--------------------------|--------------------|------------------|------------------|
|                   | [pg/L]                   |                    | [pg/L]           |                  |
| PFPeA             | 0.46±0.53                | 9.7±4.4            | 23               | 53               |
| PFHxA             | 5.2±2.1                  | 5.6±2.1            | 12               | 27               |
| PFHpA             | 4.8±1.8                  | 7.9±1.3            | 12               | 21               |
| PFOA              | 16±4                     | 11±2               | 16               | 29               |
| PFNA              | nd <sup>1</sup>          | nd                 | 6.3              | 21               |
| PFDA              | nd                       | nd                 | 6.4              | 21               |
| PFUnDA            | nd                       | nd                 | 3.7              | 12               |
| PFDoDA            | nd                       | nd                 | 3.3              | 11               |
| PFTTrDA           | nd                       | nd                 | 4.6              | 15               |
| PFTeDA            | nd                       | nd                 | 8.8              | 29               |
| PFBS              | nd                       | nd                 | 13               | 45               |
| PFHxS             | nd                       | nd                 | 18               | 61               |
| PFHpS             | nd                       | nd                 | 27               | 90               |
| L-PFOS            | 11±3                     | 11±3               | 21               | 44               |
| Br-PFOS           | 4.2±2.1                  | 5.2±2.2            | 12               | 28               |
| PFDS              | nd                       | nd                 | 32               | 93               |
| PFECHS            | nd                       | nd                 | 43               | 140              |
| HFPO-DA           | nd                       | nd                 | 6.0              | 20               |
| HFPO-TrA          | nd                       | nd                 | 44               | 150              |
| HFPO-TeA          | nd                       | nd                 | 75               | 250              |
| DONA              | nd                       | nd                 | 7.5              | 25               |
| 6:2 Cl-PFESA      | nd                       | nd                 | 6.9              | 23               |
| 8:2 Cl-PFESA      | nd                       | nd                 | 6.8              | 23               |
| 6:6 PFPiA         | nd                       | nd                 | 4.9              | 16               |
| 6:8 PFPiA         | nd                       | nd                 | 8.7              | 29               |
| L-FOSA            | nd                       | nd                 | 8.0              | 27               |
| Br-FOSA           | nd                       | nd                 | 11               | 33               |
| 4:2 FTSA          | nd                       | nd                 | 30               | 100              |
| 6:2 FTSA          | 20±7                     | 25±12              | 61               | 150              |
| 8:2 FTSA          | nd                       | nd                 | 36               | 120              |
| PFBA <sup>3</sup> | 390±580                  | 330±510            | -                | -                |

<sup>1</sup> nd = not detected

<sup>2</sup> For compounds present in blanks, MDLs and MQLs were calculated as the average blank value plus 3 or 10 times the standard deviation, respectively (blue). For PFASs other than these, the MDLs and MQLs were derived from a signal-to-noise ratio of 3 or 10, respectively, observed in low level samples (green) or spiked matrix samples (yellow).

<sup>3</sup> In blank samples processed on board, comparatively high concentrations of PFBA were found, strongly varying between the different SPE batches (red). Consequently, no results are reported for PFBA.

### **Section S3: Data analysis**

Calculation of arithmetic means and further statistical analysis was performed only for PFASs with a detection frequency >50%. Results <MDL were considered as zero and the calculated values between MDL and MQL were used unaltered for calculations. For PFAS mass transport estimates through Fram Strait, different substitution techniques of values <MDL (0,  $\sqrt{2}/2$ \*MDL and MDL) were compared (see Table S22).

OriginPro 2018 (version 9.5) was used for statistical analysis, setting the significance level at  $\alpha=0.05$ . Normality was tested by the Kolmogorov-Smirnov test, before further statistical tests were applied. To investigate the relationship between individual PFASs and between PFASs and physicochemical parameters, Pearson correlation analysis was conducted, if data was normally distributed. Otherwise, Spearman's correlation analysis was applied. To test for significant differences in PFAS concentrations and patterns between different sampling areas, two-sample t-tests were conducted. If data sets did not show homogeneity of variance according to Leuvene's test, the Welch correction was applied.



**Table S8: Coefficients of variation [%] for quantified PFASs, calculated from triplicate analysis of surface water samples taken by seawater intake system (n=2) and samples taken by CTD/rosette sampler and seawater intake system at the same time (n=7).**

| compound       | coefficient of variation [%]       |     |      |                                        |         |         |         |         |         |         |      |
|----------------|------------------------------------|-----|------|----------------------------------------|---------|---------|---------|---------|---------|---------|------|
|                | triplicates seawater intake system |     |      | comparison between sampling techniques |         |         |         |         |         |         |      |
|                | N5                                 | N22 | mean | CTD_049                                | CTD_009 | CTD_025 | CTD_036 | CTD_012 | CTD_043 | CTD_046 | mean |
| <b>PFHxA</b>   | 6                                  | 6   | 6    | 6                                      | 22      | 3       | 4       | 12      | 1       | 10      | 8    |
| <b>PFHpA</b>   | 2                                  | 9   | 5    | 4                                      | 3       | 19      | 14      | 3       | 11      | 3       | 8    |
| <b>PFOA</b>    | 5                                  | 2   | 5    | 11                                     | 16      | 13      | 13      | -       | -       | -       | 13   |
| <b>PFNA</b>    | 5                                  | 7   | 6    | 8                                      | 15      | 9       | 1       | 24      | 3       | 4       | 9    |
| <b>PFDA</b>    | -                                  | -   | -    | -                                      | -       | -       | -       | -       | -       | 18      | 18   |
| <b>PFUnDA</b>  | -                                  | 1   | 1    | -                                      | 19      | -       | -       | -       | 21      | 3       | 14   |
| <b>PFBS</b>    | 11                                 | 12  | 11   | -                                      | -       | -       | 3       | -       | -       | -       | 3    |
| <b>PFHxS</b>   | 5                                  | -   | 5    | -                                      | -       | -       | -       | -       | -       | -       | -    |
| <b>L-PFOS</b>  | 18                                 | 16  | 17   | -                                      | 20      | -       | -       | -       | -       | -       | 20   |
| <b>Br-PFOS</b> | 3                                  | 11  | 7    | -                                      | -       | -       | 3       | -       | -       | -       | 3    |
| <b>HFPO-DA</b> | 7                                  | -   | 7    | 1                                      | -       | -       | -       | 1       | -       | -       | 1    |

**Table S9: Matrix spike recoveries<sup>1</sup> for seawater.**

| matrix spiking level      | relative recovery (mean ± SD)          |
|---------------------------|----------------------------------------|
|                           | [%], n=3<br>seawater (1 L)<br>400 pg/L |
| PFBA                      | 111 ± 5                                |
| PFPeA <sup>2</sup>        | 94 ± 2                                 |
| PFHxA                     | 108 ± 6                                |
| PFHpA <sup>2</sup>        | 89 ± 3                                 |
| PFOA                      | 105 ± 0                                |
| PFNA                      | 95 ± 2                                 |
| PFDA                      | 100 ± 0                                |
| PFUnDA                    | 95 ± 2                                 |
| PFDoDA                    | 104 ± 2                                |
| PFTTrDA <sup>2</sup>      | 64 ± 3                                 |
| PFTeDA <sup>2</sup>       | 63 ± 5                                 |
| PFBS                      | 96 ± 3                                 |
| PFHxS                     | 101 ± 3                                |
| PFHpS <sup>2</sup>        | 109 ± 12                               |
| PFOS                      | 97 ± 2                                 |
| PFDS <sup>2</sup>         | 78 ± 3                                 |
| PFECHS <sup>2</sup>       | 100 ± 1                                |
| HFPO-DA                   | 94 ± 2                                 |
| HFPO-TrA <sup>2</sup>     | 88 ± 4                                 |
| HFPO-TeA <sup>2</sup>     | 73 ± 2                                 |
| DONA <sup>2</sup>         | 88 ± 2                                 |
| 6:2 Cl-PFESA <sup>2</sup> | 95 ± 3                                 |
| 8:2 Cl-PFESA <sup>2</sup> | 101 ± 2                                |
| 6:6 PFPiA <sup>3</sup>    | 69 ± 2                                 |
| 6:8 PFPiA <sup>3</sup>    | 39 ± 2                                 |
| FOSA                      | 101 ± 4                                |
| 4:2 FTSA                  | 93 ± 13                                |
| 6:2 FTSA <sup>2</sup>     | 98 ± 4                                 |
| 8:2 FTSA                  | 96 ± 11                                |

<sup>1</sup> Matrix spike recoveries [%] were calculated using the following equation:

$$\text{matrix spike recovery} = \frac{m_{\text{spiked sample}} - m_{\text{sample}}}{m_{\text{spike}}} \cdot 100 \%$$

where  $m_{\text{spiked sample}}$  is the amount of the analyte in the spiked sample [pg],  $m_{\text{sample}}$  [pg] is the amount of analyte in the unspiked sample and  $m_{\text{spike}}$  [pg] is the amount of the analyte spiked into the sample. Quantification of the compounds was based on the peak area ratio of the analyte and the assigned internal standard.

<sup>2</sup> Because for these compounds no isotopically labelled analogues were available as internal standards, they were assigned to structurally similar internal standards (Table S6). Differences in the properties of the target analyte and the assigned internal standard can explain lower relative recoveries.

<sup>3</sup> For PFPiAs, absolute values are given as there was no structurally similar internal standard to which they could be assigned.

**Table S10: Percent absolute recoveries of internal standards<sup>1</sup> in analyzed seawater samples (n=109).**

| internal standard                     | mean absolute recovery ± SD |
|---------------------------------------|-----------------------------|
|                                       | [%]                         |
| <sup>13</sup> C <sub>4</sub> -PFBA    | 24 ± 12                     |
| <sup>13</sup> C <sub>2</sub> -PFHxA   | 46 ± 7                      |
| <sup>13</sup> C <sub>4</sub> -PFOA    | 51 ± 9                      |
| <sup>13</sup> C <sub>5</sub> -PFNA    | 48 ± 9                      |
| <sup>13</sup> C <sub>2</sub> -PFDA    | 49 ± 10                     |
| <sup>13</sup> C <sub>2</sub> -PFUnDA  | 53 ± 11                     |
| <sup>13</sup> C <sub>2</sub> -PFDoDA  | 50 ± 12                     |
| <sup>18</sup> O <sub>2</sub> -PFHxS   | 51 ± 8                      |
| <sup>13</sup> C <sub>4</sub> -PFOS    | 47 ± 9                      |
| <sup>13</sup> C <sub>3</sub> -HFPO-DA | 43 ± 6                      |

<sup>1</sup> Percent absolute recoveries of the internal standards were calculated using the following equations:

$$RF = \frac{\text{area (InjS cal)} \cdot c \text{ (IS cal)}}{\text{area (IS cal)} \cdot c \text{ (InjS cal)}}$$

RF response factor  
 area (InjS cal) peak area of the injection standard 13C8-PFOA in the sample [cps]  
 area (IS cal) peak area of the internal standard in the calibration standard [cps]  
 c (IS cal) concentration of the internal standard in the calibration standard [cps]  
 c (InjS cal) concentration of the injection standard 13C8-PFOA in the calibration standard [cps]

$$\text{absolute IS recovery rate [\%]} = RF \text{ (mean)} \cdot \frac{\text{area (IS sample)}}{\text{area (InjS sample)}} \cdot \frac{c \text{ (InjS sample)}}{c \text{ (IS sample)}} \cdot 100 \%$$

RF (mean) mean response factor of all calibration standards  
 area (IS sample) peak area of the internal standard in the sample [cps]  
 area (InjS sample) peak area of the injection standard 13C8-PFOA in the sample [cps]  
 c (InjS sample) concentration of the injection standard 13C8-PFOA in the sample [cps]  
 c (IS sample) concentration of the internal standard in the sample [cps]

**Table S11: Verification of the method's trueness by analysis of the reference material IRMM-428.** The reference material was produced by the European Commission, Joint Research Center (JRC), Institute for Reference Materials and Measurements (IRMM). Tap drinking water from the Netherlands, spiked with a mixture of PFASs, was characterised by intercomparison among 12 laboratories and 6 certified values and 1 indicative value were assigned. The values given in the certification report were compared to the results derived from analysis of the reference material using the routine method in our laboratory.

|        | certified value $\pm U_{Ref}^1$<br>[ng/L] | measured value $\pm SD^2$<br>[ng/L] | recovery [%] | z-score <sup>3</sup> |
|--------|-------------------------------------------|-------------------------------------|--------------|----------------------|
| PFPeA  | 4.0 $\pm$ 1.0                             | 3.7 $\pm$ 0.1                       | 93           | -0.57                |
| PFHxA  | 7.4 $\pm$ 1.0                             | 7.5 $\pm$ 0.2                       | 101          | 0.15                 |
| PFHpA  | 3.7 $\pm$ 0.7                             | 3.1 $\pm$ 0.1                       | 84           | -1.6                 |
| PFNA   | 3.9 $\pm$ 1.4*                            | 3.4 $\pm$ 0.4                       | 87           | -0.68                |
| PFBS   | 5.5 $\pm$ 1.4                             | 6.3 $\pm$ 0.1                       | 115          | 1.1                  |
| PFHxS  | 3.6 $\pm$ 1.0                             | 3.6 $\pm$ 0.1                       | 101          | 0.050                |
| L-PFOS | 9.6 $\pm$ 1.7                             | 8.8 $\pm$ 1.1                       | 92           | -0.71                |

<sup>1</sup> expanded uncertainty reference sample (confidence level 95 %, k=2)

<sup>2</sup> standard deviation of the measurement series in our laboratory (n=3)

<sup>3</sup> The z-score was calculated using the following equation:

$$z\text{-score} = \frac{(C_{\text{measured}} - C_{\text{certified}})}{\sqrt{\left(\frac{U_{\text{ref}}}{2}\right)^2 + \left(\frac{SD}{\sqrt{3}}\right)^2}}$$

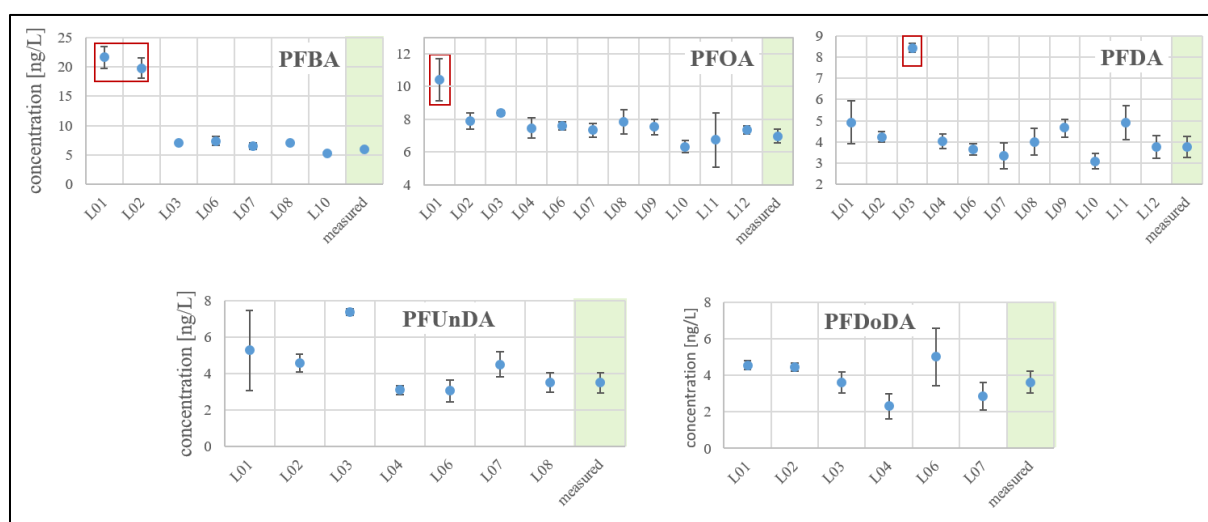

**Figure S4: Comparison of own measured values (marked in green) with laboratory intercomparison results (L01–L12) provided in the certification report for the compounds to which no certified value was assigned. The JRC did not assign values to substances for which the interlaboratory comparison results disagreed significantly without a technical reason (PFBA, PFOA, PFDA; outliers marked in red) and to substances which were not included in homogeneity and stability studies (PFUnDA and PFDoDA). The number of interlaboratory comparison results is different from compound to compound because the number of analytes differed between laboratories. Further information on the reference material can be found in the certification report.<sup>10</sup>**

#### **Section S4: Water transport data used for calculation of PFAS mass transport estimates through Fram Strait**

Reported estimates of water transport budgets in and out of Fram Strait vary significantly due to complex recirculation patterns and strong mesoscale activity that complicate data interpretation.<sup>11-14</sup> Here, we focused on the boundary currents defined in accordance with Stöven et al.<sup>15</sup>

- Atlantic Water (AW) advected in the West Spitsbergen Current (WSC): longitude 5-9°E and depth  $\leq 840$  m
- Polar Water (PW) flowing southward in the EGC, defined as mean temperature  $\leq 1^\circ\text{C}$  and depth  $\leq 400$  m
- Recirculating and Arctic Atlantic Water (RAW/AAW), transported through Fram Strait both due to recirculation of Atlantic Water and the long loop of Atlantic Water through the Arctic Ocean: longitude 7°W to 1°E, depth  $\leq 840$  m, not defined as Polar Water

Stöven et al. assumed the exchange flow across Fram Strait below 840 m to be 0 Sv as there are no connections between the Nordic Seas and the Arctic Ocean below the sill depth of the Greenland-Scotland-Ridge (840 m) other than Fram Strait.<sup>15</sup> No vertical displacements of isopycnals in these two basins are observed indicating a non-zero net transport through Fram Strait below 840 m.<sup>16</sup>

Water mass transport estimates with the AW, PW and RAW/AAW were based on the MIT general circulation model (MITgcm) ECCO v4. The MITgcm has a global resolution of  $1^\circ \times 1^\circ$ , with a finer resolution in the Arctic and near the equator and 50 vertical layers spanning 10 m intervals near the surface and 500 m at the bottom of the ocean. Ocean state estimates are derived from the Estimating the Circulation & Climate of the Ocean (ECCO v4) climatology.<sup>17</sup> The water transport masses reported here are averages over the years 2011-2015. While transport velocities change strongly between seasons and on shorter time scales, there is no strong interannual trend in Fram Strait.<sup>12</sup> Therefore, modeled average volume transport over the period 2011-2015 is assumed representative of the volume transport through Fram Strait in 2018, when the samples for PFAS analysis were taken.

Modeled net transport through Fram Strait with the boundary currents is southward. It is in the same range as estimated from an array of 17 moorings at 78°50'N between 2002 and 2010<sup>15</sup> (see table below).

| <b>water mass</b> | <b>volume (Sv)</b>           |                                                                |
|-------------------|------------------------------|----------------------------------------------------------------|
|                   | <b>MITgcm</b><br>(2011-2015) | <b>observations<sup>15</sup></b><br>(mooring array, 2002-2010) |
| AW                | 3.7                          | 4.4( $\pm$ 3.2)                                                |
| PW                | -0.6                         | -1.4( $\pm$ 0.8)                                               |
| RAW/AAW           | -3.8                         | -3.5( $\pm$ 1.9)                                               |
| $\Sigma$          | -0.7                         | -0.5                                                           |

**Table S12: Detection frequencies [%], concentration ranges [pg/L], mean concentrations [pg/L] and median values [pg/L] of detected PFASs in surface water samples of the entire study area and along a latitudinal transect from the European continent to the Arctic.** Values in brackets are between MDL and MQL. Of the physicochemical parameters, temperature [°C], salinity [PSU] and water depth [m] are given for the different sampling areas.

| PFASs <sup>1</sup> | entire study area (n=40) |              |             |               | latitudinal transect from the European continent to the Arctic Ocean (57°N to 79°N at ~5°E) |              |             |               |                                                                                      |              |             |               |                                                   |              |             |               |
|--------------------|--------------------------|--------------|-------------|---------------|---------------------------------------------------------------------------------------------|--------------|-------------|---------------|--------------------------------------------------------------------------------------|--------------|-------------|---------------|---------------------------------------------------|--------------|-------------|---------------|
|                    |                          |              |             |               | North Sea/continental shelf<br><i>Norwegian Coastal Current (NCC)</i><br>(n=5)              |              |             |               | Norwegian Sea/continental slope<br><i>Norwegian Atlantic Current (NwAC)</i><br>(n=6) |              |             |               | Greenland and Norwegian Sea/deep waters<br>(n=10) |              |             |               |
|                    | DF [%]                   | range [pg/L] | mean [pg/L] | median [pg/L] | DF [%]                                                                                      | range [pg/L] | mean [pg/L] | median [pg/L] | DF [%]                                                                               | range [pg/L] | mean [pg/L] | median [pg/L] | DF [%]                                            | range [pg/L] | mean [pg/L] | median [pg/L] |
| HFPO-DA            | 90                       | <MDL-120     | 30          | 21            | 100                                                                                         | 52-120       | 92          | 94            | 100                                                                                  | (19)-33      | 25          | 25            | 80                                                | <MDL-26      | (16)        | (17)          |
| PFHxA              | 100                      | (17)-110     | 56          | 53            | 100                                                                                         | 74-110       | 96          | 100           | 100                                                                                  | 33-70        | 51          | 51            | 100                                               | (17)-66      | 35          | 30            |
| PFHpA              | 100                      | (20)-100     | 40          | 32            | 100                                                                                         | 67-100       | 86          | 88            | 100                                                                                  | 25-44        | 33          | 30            | 100                                               | (20)-30      | 23          | 22            |
| PFOA               | 100                      | 38-170       | 66          | 56            | 100                                                                                         | 120-170      | 140         | 140           | 100                                                                                  | 41-76        | 59          | 59            | 100                                               | 38-56        | 47          | 45            |
| PFNA               | 100                      | 22-55        | 34          | 33            | 100                                                                                         | 45-55        | 49          | 49            | 100                                                                                  | 35-44        | 38          | 38            | 100                                               | 22-45        | 31          | 31            |
| PFDA               | 68                       | <MDL-(20)    | (8.1)       | (8.2)         | 100                                                                                         | 13-(20)      | (16)        | (16)          | 100                                                                                  | (11)-(19)    | (14)        | (14)          | 100                                               | (7.0)-(16)   | (11)        | (11)          |
| PFUnDA             | 83                       | <MDL-17      | (7.5)       | (6.8)         | 100                                                                                         | (9.3)-(13)   | (11)        | (11)          | 100                                                                                  | (10)-17      | 13          | 13            | 100                                               | (6.4)-16     | (10)        | (9.3)         |
| PFDoDA             | 42                       | <MDL-(10)    | -           | -             | 80                                                                                          | <MDL-6.5     | (4.1)       | (5.0)         | 67                                                                                   | <MDL-(10)    | (4.9)       | (5.8)         | 60                                                | MDL-(10)     | (3.4)       | (4.0)         |
| PFBS               | 100                      | (15)-93      | (39)        | (38)          | 100                                                                                         | 57-93        | 75          | 69            | 67                                                                                   | (19)-(39)    | (31)        | (32)          | 100                                               | (15)-(28)    | (23)        | (25)          |
| PFHxS              | 39                       | <MDL-54      | -           | -             | 100                                                                                         | (38)-(54)    | (49)        | (52)          | 100                                                                                  | (19)-(24)    | (21)        | (22)          | 0                                                 | <MDL         | -           | -             |
| L-PFOS             | <sup>2</sup>             | <MDL-110     | (42)        | (32)          | 100                                                                                         | 60-110       | 91          | 100           | 100                                                                                  | (35)-83      | 56          | 58            | 80                                                | <MDL-(32)    | (23)        | (27)          |
| Br-PFOS            | <sup>2</sup>             | <MDL-68      | (24)        | (19)          | 100                                                                                         | 46-68        | 57          | 58            | 100                                                                                  | (19)-35      | (28)        | (27)          | 80                                                | <MDL-(19)    | (13)        | (15)          |
| ΣPFASs             | -                        | 140-850      | 340         | 280           | -                                                                                           | 680-850      | 770         | 780           | -                                                                                    | 270-430      | 370         | 390           | -                                                 | 140-290      | 230         | 240           |
| physicoch. par.    |                          | range        | mean        | median        |                                                                                             | range        | mean        | median        |                                                                                      | range        | mean        | median        |                                                   | range        | mean        | median        |
| temperature [°C]   | -                        | -1.43-14.52  | 5.48        | 5.72          | -                                                                                           | 11.14-14.52  | 13.21       | 13.58         | -                                                                                    | 9.91-13.14   | 11.63       | 11.78         | -                                                 | 5.36-8.87    | 6.91        | 6.52          |
| salinity [psu]     | -                        | 30.00-35.06  | 33.35       | 34.78         | -                                                                                           | 31.78-33.73  | 32.58       | 32.41         | -                                                                                    | 34.69-35.05  | 34.90       | 34.90         | -                                                 | 34.86-35.06  | 35.02       | 35.03         |
| water depth [m]    | -                        | 51-3200      | 1630        | 1770          | -                                                                                           | 51-300       | 170         | 150           | -                                                                                    | 976-1765     | 1280        | 1280          | -                                                 | 2450-3200    | 2840        | 2850          |

<sup>1</sup> Due to high blanks, no values can be reported for PFBA. In addition, PFPeA could not be evaluated because of matrix interferences.

<sup>2</sup> PFOS could not be evaluated in 10 of the 40 samples because of matrix interferences. The given values refer to only the samples in which no interferences occurred.

**Table S13: Detection frequencies [%], concentration ranges [pg/L], mean concentrations [pg/L] and median values [pg/L] of detected PFASs in surface water samples along a longitudinal and a latitudinal sampling transect in Fram Strait.** Values in brackets are between MDL and MQL. Of the physicochemical parameters, temperature [°C], salinity [PSU] and water depth [m] are given for the different sampling areas.

| PFASs <sup>2</sup>           | longitudinal transect across Fram Strait (9°E to 18°W at ~ 79°N) |              |             |               |                                  |              |             |               | latitudinal transect along the prime meridian (78°N to 81°N at ~ 0°EW) (n=5) |              |             |               |
|------------------------------|------------------------------------------------------------------|--------------|-------------|---------------|----------------------------------|--------------|-------------|---------------|------------------------------------------------------------------------------|--------------|-------------|---------------|
|                              | east of 0°EW, ice-free (n=4+1 <sup>1</sup> )                     |              |             |               | west of 0°EW, ice-covered (n=10) |              |             |               | DF [%]                                                                       | range [pg/L] | mean [pg/L] | median [pg/L] |
|                              | DF [%]                                                           | range [pg/L] | mean [pg/L] | median [pg/L] | DF [%]                           | range [pg/L] | mean [pg/L] | median [pg/L] | DF [%]                                                                       | range [pg/L] | mean [pg/L] | median [pg/L] |
| HFPO-DA                      | 100                                                              | (14)-45      | 29          | 29            | 80                               | <MDL         | (14)        | (12)          | 100                                                                          | (15)-70      | 33          | 28            |
| PFHxA                        | 100                                                              | 39-51        | 44          | 43            | 100                              | 52-78        | 64          | 63            | 100                                                                          | 39-75        | 58          | 57            |
| PFHpA                        | 100                                                              | 21-28        | 24          | 24            | 100                              | 36-58        | 46          | 46            | 100                                                                          | 26-54        | 39          | 41            |
| PFOA                         | 100                                                              | 38-48        | 43          | 42            | 100                              | 49-66        | 57          | 57            | 100                                                                          | 61-95        | 73          | 71            |
| PFNA                         | 100                                                              | 22-29        | 25          | 24            | 100                              | 31-38        | 33          | 32            | 100                                                                          | 29-36        | 32          | 31            |
| PFDA                         | 60                                                               | <MDL-(8.2)   | <MDL        | (7.0)         | 0                                | <MDL         | -           | -             | 80                                                                           | <MDL-8.1     | <MDL        | (6.9)         |
| PFUnDA                       | 100                                                              | (4.9)-(7.1)  | (6.1)       | (6.4)         | 30                               | <MDL-(5.7)   | -           | -             | 100                                                                          | 5.3-7.4      | (6.0)       | (5.8)         |
| PFDoDA                       | 40                                                               | <MDL-(3.6)   | -           | -             | 0                                | <MDL         | -           | -             | 20                                                                           | <MDL-5.0     | -           | -             |
| PFBS                         | 100                                                              | (21)-(29)    | (24)        | (23)          | 100                              | (38)-56      | (43)        | (40)          | 100                                                                          | 23-64        | 53          | 59            |
| PFHxS                        | 0                                                                | <MDL         | -           | -             | 20                               | <MDL-(24)    | -           | -             | 60                                                                           | <MDL-27      | <MDL        | (23)          |
| L-PFOS                       | <sup>3a</sup>                                                    | (24)-(33)    | (29)        | (29)          | <sup>3b</sup>                    | <MDL-(37)    | (22)        | (28)          | <sup>3c</sup>                                                                | 25-35        | (31)        | 34            |
| Br-PFOS                      | <sup>3a</sup>                                                    | (12)-(19)    | (16)        | (17)          | <sup>3b</sup>                    | <MDL-(13)    | <MDL        | (13)          | <sup>3c</sup>                                                                | 15-21        | (18)        | (17)          |
| ΣPFASs (DF>50%) <sup>4</sup> | -                                                                | 170-210      | 190         | 190           | -                                | 230-290      | 260         | 260           | -                                                                            | 190-310      | 260         | 280           |
| physicoch. par.              |                                                                  | range        | mean        | median        |                                  | range        | mean        | median        |                                                                              | range        | mean        | median        |
| temperature [°C]             | -                                                                | 5.48-6.31    | 6.00        | 6.12          | -                                | -1.43-0.45   | -0.6        | -0.44         | -                                                                            | -1.26-4.41   | 0.69        | -0.87         |
| salinity [PSU]               | -                                                                | 34.86-35.03  | 34.95       | 34.93         | -                                | 30.00-31.50  | 30.55       | 30.42         | -                                                                            | 31.74-34.44  | 32.79       | 32.41         |
| water depth [m]              | -                                                                | 220-2500     | 920         | 480           | -                                | 78-2600      | 558         | 235           | -                                                                            | 2600-3200    | 2900        | 3000          |

<sup>1</sup> At sampling location N21/F5, the latitudinal transect from the European continent to the Arctic and the longitudinal transect across Fram Strait crossed. Consequently, this sample was used for evaluation of both sampling transects.

<sup>2</sup> Due to high blanks, no values can be reported for PFBA. In addition, PFPeA could not be evaluated because of matrix interferences.

<sup>3a-c</sup> PFOS could not be evaluated in (a) two, (b) seven and (c) two of the samples because of matrix interferences. The given values refer to only the samples in which no interferences occurred.

<sup>4</sup> ΣPFASs only includes the compounds with a detection frequency >50% in samples of the longitudinal sampling transect across Fram Strait (C6-C9 PFCAs, PFBS and HFPO-DA).



**Table S14: Concentrations [pg/L] of detected PFASs in surface seawater samples taken along a latitudinal transect from the European continent to the Arctic (57°N to 79°N at ~5°E).**  
 Values in brackets are between MDL and MQL.

| station ID      | HFPO-DA | PFHxA | PFHpA | PFOA   | PFNA | PFDA   | PFUnDA | PFDoDA | PFBS | PFHxS  | L-PFOS | Br-PFOS | ΣPFASs |
|-----------------|---------|-------|-------|--------|------|--------|--------|--------|------|--------|--------|---------|--------|
| N1              | 86      | 74    | 84    | 150    | 48   | (16)   | (12)   | (6.0)  | 69   | (52)   | 66     | 46      | 710    |
| N2              | 94      | 110   | 88    | 140    | 45   | (13)   | (9.3)  | <MDL   | 93   | (50)   | 110    | 68      | 820    |
| N3              | 52      | 110   | 67    | 120    | 49   | (18)   | 13     | (6.5)  | 57   | (38)   | 100    | 53      | 680    |
| N4              | 100     | 100   | 100   | 170    | 55   | (20)   | (9.6)  | (5.0)  | 69   | (54)   | 110    | 60      | 850    |
| N5 <sup>1</sup> | 120±8   | 93±5  | 92±2  | 140±10 | 49±2 | (14±3) | (11±1) | <MDL   | 88±9 | (53±3) | 60±11  | 58±2    | 780±30 |
| N6              | 33      | 70    | 44    | 76     | 39   | (13)   | (11)   | <MDL   | (39) | (23)   | 58     | (27)    | 430    |
| N7              | 23      | 53    | 28    | 50     | 37   | (11)   | 14     | (6.2)  | (38) | (22)   | 83     | 35      | 400    |
| N8              | 21      | 40    | 29    | 57     | 37   | (13)   | 15     | (7.5)  | (38) | (22)   | 57     | (27)    | 360    |
| N9              | 26      | 58    | 32    | 30     | 35   | (14)   | (11)   | (5.4)  | (26) | (24)   | 60     | (27)    | 380    |
| N10             | (19)    | 33    | 25    | 41     | 39   | (15)   | (10)   | <MDL   | (19) | (18)   | (35)   | (19)    | 270    |
| N11             | 29      | 49    | 39    | 74     | 44   | (19)   | 17     | (10)   | (25) | (19)   | (40)   | 30      | 390    |
| N12             | 26      | 31    | 22    | 47     | 33   | (14)   | (12)   | (5.5)  | (15) | <MDL   | (32)   | (15)    | 250    |
| N13             | 21      | 29    | 30    | 55     | 45   | (16)   | 16     | (10)   | (25) | <MDL   | (28)   | (15)    | 290    |
| N14             | (15)    | 44    | 26    | 53     | 36   | (14)   | (10)   | (6.2)  | (27) | <MDL   | (29)   | (19)    | 280    |
| N15             | (14)    | (26)  | 24    | 42     | 31   | (12)   | (10)   | (4.4)  | (25) | <MDL   | (27)   | (15)    | 230    |
| N16             | <MDL    | 29    | 21    | 39     | 27   | (10)   | (6.5)  | <MDL   | (24) | <MDL   | <MDL   | <MDL    | 160    |
| N17             | <MDL    | (17)  | (20)  | 42     | 23   | (8.8)  | (8.2)  | <MDL   | (21) | <MDL   | <MDL   | <MDL    | 140    |
| N18             | (15)    | (25)  | (20)  | 43     | 26   | (9.2)  | (8.5)  | <MDL   | (28) | <MDL   | (29)   | (18)    | 220    |
| N19             | 24      | 33    | (20)  | 53     | 31   | (12)   | (11)   | (4.4)  | (25) | <MDL   | (27)   | (18)    | 260    |
| N20             | (20)    | 66    | 23    | 56     | 35   | (9.7)  | (6.8)  | <MDL   | (21) | <MDL   | (30)   | (13)    | 280    |
| N21             | 21      | 51    | 24    | 37     | 22   | (7.0)  | (6.4)  | (3.6)  | (22) | <MDL   | (24)   | (19)    | 240    |

<sup>1</sup> Mean±SD is given for this sample, as a triplicate of the sample was analyzed.

**Table S15: Concentrations [pg/L] of detected PFASs in surface seawater samples taken along a longitudinal transect across Fram Strait (9°E to 18°W at ~79°N).** Values in brackets are between MDL and MQL.

| station ID | HFPO-DA | PFHxA | PFHpA | PFOA | PFNA | PFDA  | PFUnDA | PFDoDA | PFBS | PFHxS | L-PFOS          | Br-PFOS | ΣPFASs(DF>50%) <sup>2</sup> |
|------------|---------|-------|-------|------|------|-------|--------|--------|------|-------|-----------------|---------|-----------------------------|
| F1         | 45      | 41    | 21    | 45   | 24   | (7.1) | (6.7)  | (3.6)  | (29) | <MDL  | (31)            | (18)    | 205.8                       |
| F2         | (14)    | 43    | 24    | 41   | 24   | <MDL  | (5.3)  | <MDL   | (25) | <MDL  | (27)            | (12)    | 171.0                       |
| F3         | 35      | 43    | 22    | 41   | 28   | (8.2) | (7.1)  | <MDL   | (21) | <MDL  | (33)            | (16)    | 190.4                       |
| F4         | 29      | 39    | 28    | 48   | 29   | <MDL  | (5.0)  | <MDL   | (23) | <MDL  | na <sup>1</sup> | na      | 196.2                       |
| F5(=N21)   | 21      | 51    | 24    | 37   | 22   | (7.0) | (6.4)  | (3.6)  | (22) | <MDL  | (24)            | (19)    | 177.5                       |
| F6         | <MDL    | 71    | 36    | 63   | 31   | <MDL  | <MDL   | <MDL   | 56   | <MDL  | na              | na      | 258.4                       |
| F7         | (12)    | 67    | 37    | 48   | 32   | <MDL  | <MDL   | <MDL   | (38) | <MDL  | na              | na      | 234.5                       |
| F8         | (11)    | 63    | 45    | 50   | 34   | <MDL  | <MDL   | <MDL   | (39) | (19)  | na              | na      | 241.6                       |
| F9         | (11)    | 55    | 49    | 58   | 32   | <MDL  | <MDL   | <MDL   | (39) | <MDL  | na              | na      | 243.5                       |
| F10        | <MDL    | 58    | 44    | 56   | 32   | <MDL  | <MDL   | <MDL   | (39) | <MDL  | na              | na      | 228.0                       |
| F11        | 38      | 62    | 47    | 54   | 33   | <MDL  | (5.4)  | <MDL   | (44) | <MDL  | na              | na      | 278.5                       |
| F12        | (13)    | 78    | 46    | 58   | 35   | <MDL  | <MDL   | <MDL   | (40) | <MDL  | na              | na      | 269.3                       |
| F13        | (13)    | 64    | 49    | 57   | 38   | <MDL  | (5.7)  | <MDL   | 52   | (24)  | <MDL            | <MDL    | 272.0                       |
| F14        | (16)    | 52    | 54    | 65   | 32   | <MDL  | (4.8)  | <MDL   | (38) | <MDL  | (37)            | (13)    | 257.5                       |
| F15        | 24      | 69    | 58    | 64   | 32   | <MDL  | <MDL   | <MDL   | 45   | <MDL  | (28)            | (13)    | 291.5                       |

<sup>1</sup>na: not analyzable (PFOS could not be evaluated in these samples because of matrix interferences)

<sup>2</sup>ΣPFASs only includes the compounds with a detection frequency >50% in samples of the longitudinal sampling transect across Fram Strait (C6-C9 PFCAs, PFBS and HFPO-DA).

**Table S16: Concentrations [pg/L] of detected PFASs in surface seawater samples taken along a latitudinal transect along the prime meridian (78 °N to 81 °N at ~ 0°EW).** Values in brackets are between MDL and MQL.

| station ID | HFPO-DA | PFHxA | PFHpA | PFOA | PFNA | PFDA  | PFUnDA | PFDoDA | PFBS | PFHxS | L-PFOS          | Br-PFOS | ΣPFASs(DF>50%) <sup>2</sup> |
|------------|---------|-------|-------|------|------|-------|--------|--------|------|-------|-----------------|---------|-----------------------------|
| P1         | (15)    | 39    | 26    | 61   | 29   | <MDL  | (5.3)  | <MDL   | (23) | <MDL  | (25)            | (15)    | 193.3                       |
| P2         | 28      | 50    | 26    | 64   | 31   | (8.1) | (7.4)  | (5.0)  | 58   | <MDL  | (34)            | (17)    | 228.9                       |
| P3         | 22      | 68    | 41    | 71   | 30   | (6.9) | (5.3)  | <MDL   | 64   | (27)  | na <sup>1</sup> | na      | 296.0                       |
| P4         | 31      | 75    | 54    | 91   | 33   | (7.5) | (6.1)  | <MDL   | 59   | (25)  | na              | na      | 314.5                       |
| P5         | 70      | 57    | 48    | 77   | 36   | (6.5) | (5.8)  | <MDL   | 60   | (23)  | (35)            | (21)    | 277.4                       |

<sup>1</sup>na: not analyzable (PFOS could not be evaluated in these samples because of matrix interferences)

<sup>2</sup>ΣPFASs only includes the compounds with a detection frequency >50% in samples of the longitudinal sampling transect across Fram Strait (C6-C9 PFCAs, PFBS and HFPO-DA).

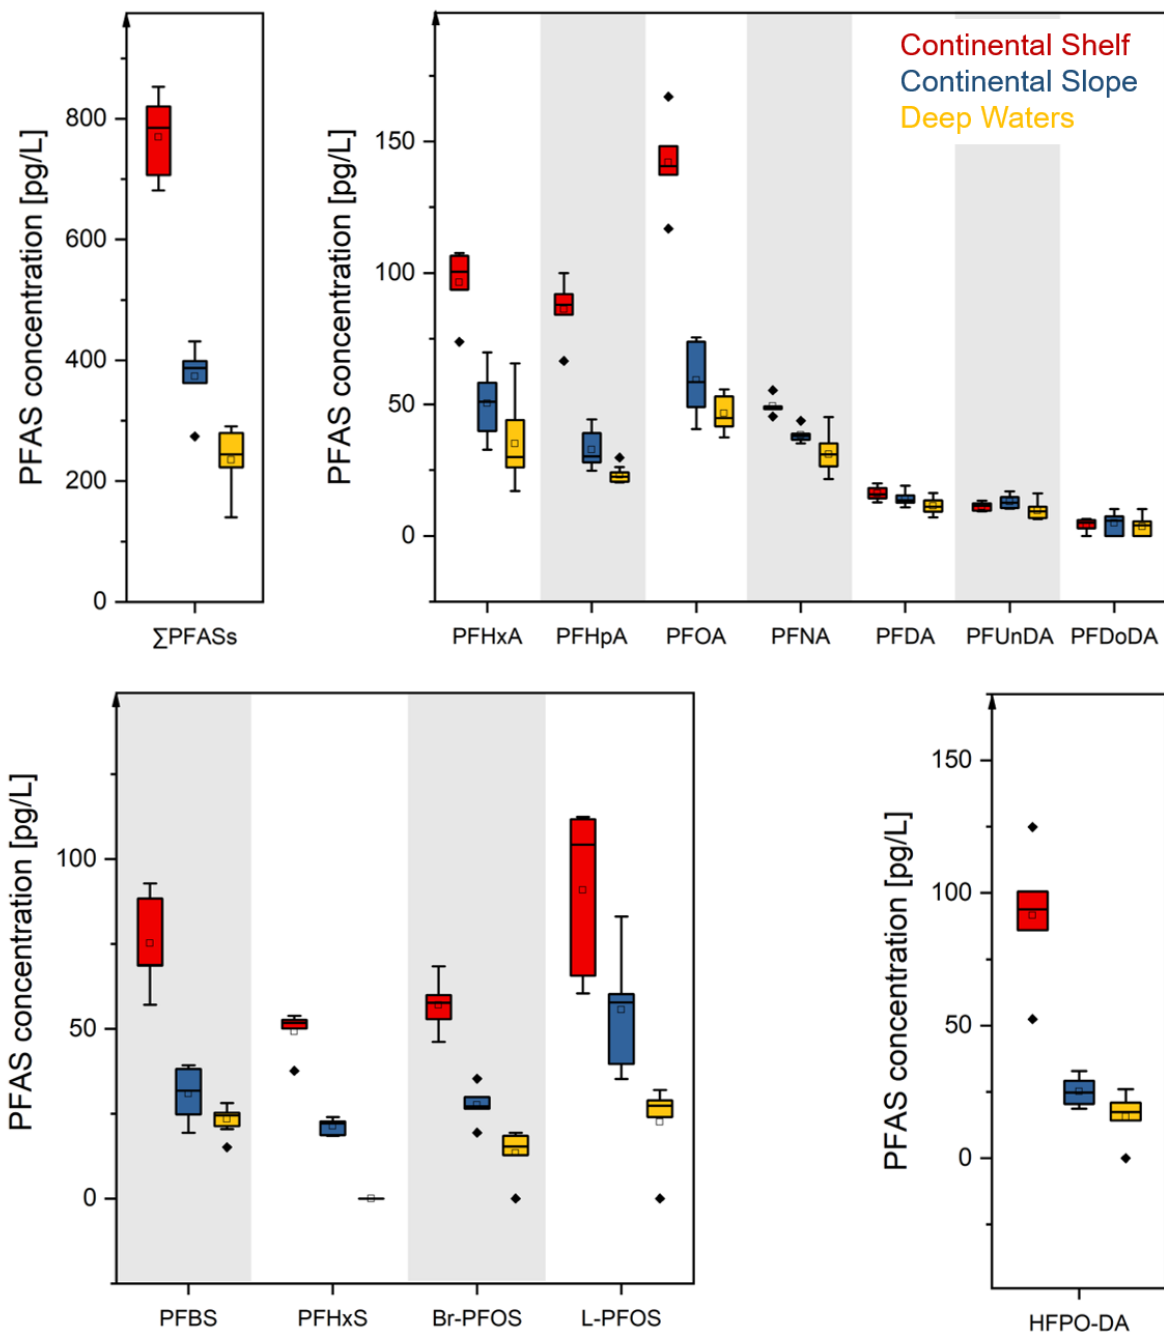

**Figure S5: Boxplots showing PFAS concentrations in surface water samples from the North Sea continental shelf (samples N1-N5, red), the continental slope (N6 to N11, blue) and deep water regions of the Norwegian Sea and Greenland Sea (N12 to N21, yellow). The box represents the 25% to 75% quartile, the median is plotted by the band inside the box and the mean by the blank square. The ends of the whiskers display the lowest and the highest concentration still within 1.5 IQR of the lower and higher quartile. Outliers are plotted with a black diamond.**

### **Section S5: Potential sources of HFPO-DA to European coastal waters**

A fluoropolymer manufacturing plant in the Rhine-Meuse delta is assumed to be a major source of HFPO-DA in European coastal areas.<sup>18-20</sup> The manufacturer started to replace PFOA by HFPO-DA in the United States in 2005. No information is available on when HFPO-DA production and use started at the plant in the Rhine-Meuse delta, but PFOA emissions decreased strongly from 2002 on and ceased in 2012.<sup>21</sup> Reanalysis of water sample extracts from the Rhine-Meuse delta showed that the compound had been present in 2008 already (Figures S6 and S7). This indicates that at least since then, there have been HFPO-DA emissions into the European environment.

The emission permit of the fluoropolymer manufacturer in the Netherlands of HFPO-DA to surface water was 6400 kg/year from 2012 to 2017, before being lowered to 2035 kg/year in 2017 and to 148 kg/year in 2019.<sup>21</sup> HFPO-DA concentrations up to 812 ng/L were reported for river water samples taken downstream of the chemical park in 2016.<sup>20</sup> It can be hypothesized that HFPO-DA is transported from the Rhine-Meuse delta to North Sea coastal waters, from where radionuclide tracer studies suggest transit times of 2-3 years to Fram Strait.<sup>22</sup>

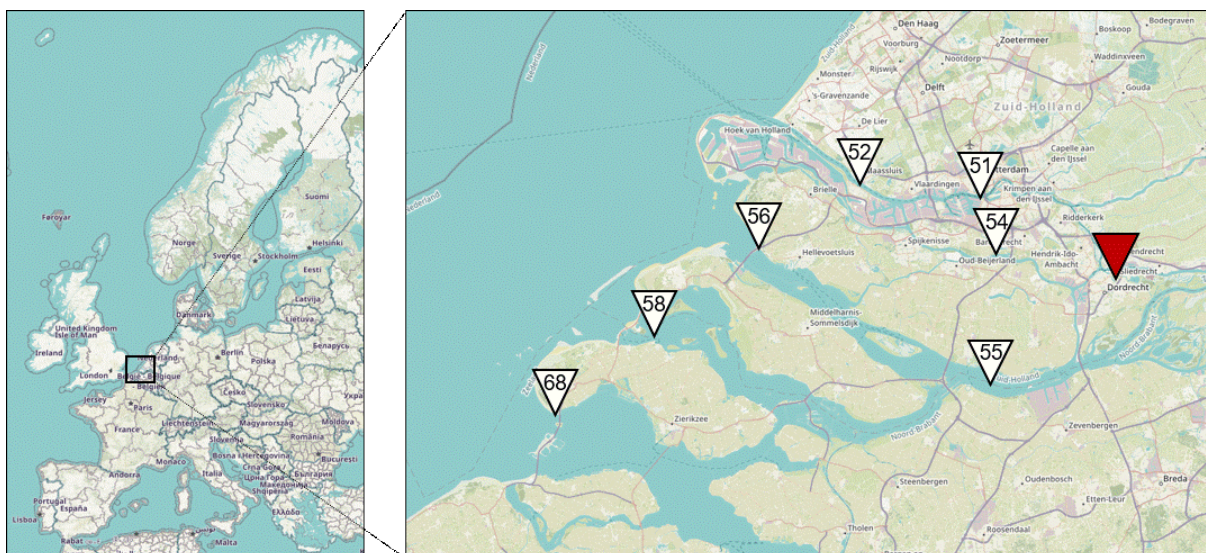

**Figure S6: Sampling locations of reanalyzed samples, taken in the Rhine-Meuse delta in 2008 by Möller et al.<sup>23</sup>** The red triangle shows the fluoropolymer manufacturing plant, which is assumed to be a major source of HFPO-DA in European coastal areas. The replacement compound HFPO-DA has not yet been under discussion in 2008 and was not included in the analytical method. Results for legacy PFASs can be found in reference <sup>23</sup>. The basic map was taken from Openstreetmap (CC-BY-SA 2.0).

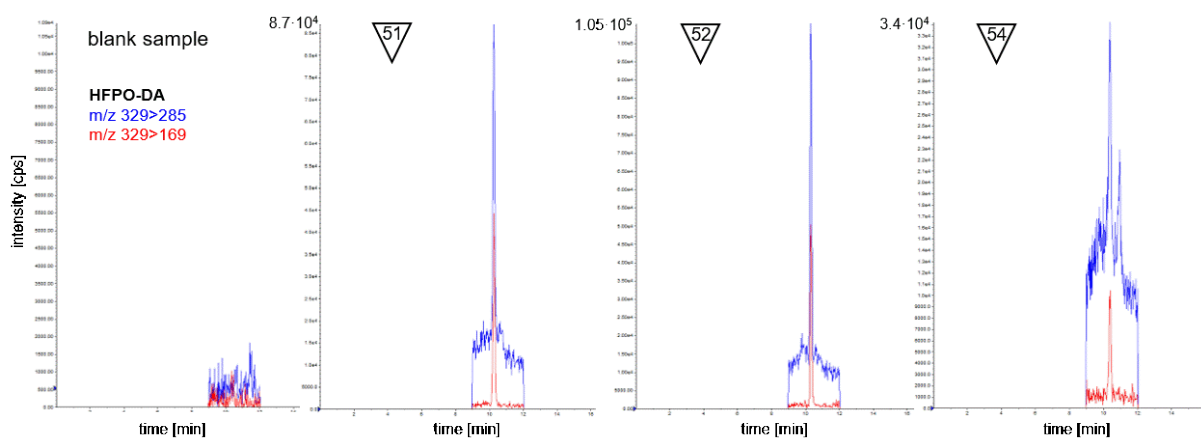

**Figure S7: LC-MS/MS chromatograms of the replacement compound HFPO-DA in sample extracts from 2008, reanalyzed using the current instrumental method.** The extracts had been stored in brown-glass vials at  $-20\text{ }^{\circ}\text{C}$  for ten years. Before instrumental analysis, methanol was topped on to a volume of approximately  $200\text{ }\mu\text{L}$ . The vials were put into an ultrasonic bath for 30 min and vortexed for 5 min. Chromatograms are shown for the blank sample and the samples in which HFPO-DA was detected. In samples 55, 56, 58 and 68, HFPO-DA was not detected.

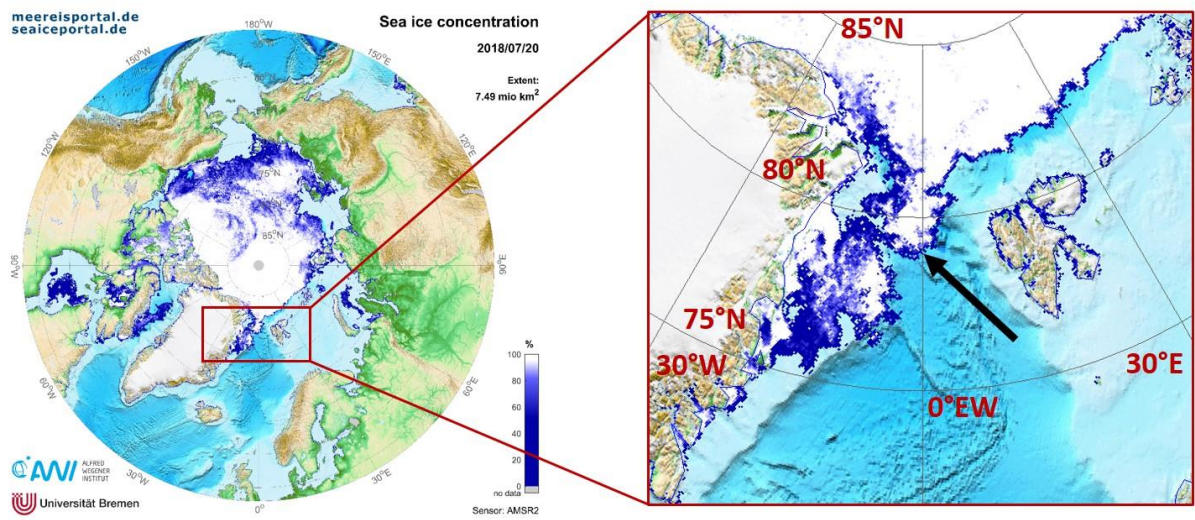

**Figure S8: Sea ice concentration in the Arctic during the cruise.**<sup>24</sup> The black arrow marks the location at which the longitudinal sampling transect in Fram Strait (~79°N) cuts across the ice edge near the prime meridian (0°EW).

**Table S17: Pearson correlation coefficients r between physicochemical parameters and PFASs as well as among individual PFASs in surface water samples taken along a longitudinal transect across Fram Strait (9°E to 18°W at ~79°N). Statistically significant values are marked with \* (p<0.05). Correlation analysis was conducted only for compounds with a detection frequency >50% (C6-C9 PFCAs, PFBS and HFPO-DA).**

|                          | temperature | pH     | salinity | PFHxA  | PFHpA | PFOA  | PFNA  | PFBS  | HFPO-DA | ΣPFASs(DF>50%) | PFHpA/PFNA |
|--------------------------|-------------|--------|----------|--------|-------|-------|-------|-------|---------|----------------|------------|
| <b>temperature</b>       | 1           |        |          |        |       |       |       |       |         |                |            |
| <b>pH</b>                | 0.82*       | 1      |          |        |       |       |       |       |         |                |            |
| <b>salinity</b>          | 0.98*       | 0.85*  | 1        |        |       |       |       |       |         |                |            |
| <b>PFHxA</b>             | -0.82*      | -0.66* | -0.76*   | 1      |       |       |       |       |         |                |            |
| <b>PFHpA</b>             | -0.90*      | -0.91* | -0.91*   | 0.67*  | 1     |       |       |       |         |                |            |
| <b>PFOA</b>              | -0.82*      | -0.79* | -0.78*   | 0.62*  | 0.86* | 1     |       |       |         |                |            |
| <b>PFNA</b>              | -0.83*      | -0.85* | -0.82*   | 0.70*  | 0.79* | 0.71* | 1     |       |         |                |            |
| <b>PFBS</b>              | -0.87*      | -0.70* | -0.80*   | 0.81*  | 0.73* | 0.82* | 0.75* | 1     |         |                |            |
| <b>HFPO-DA</b>           | 0.56        | 0.42   | 0.52*    | -0.52* | -0.38 | -0.40 | -0.39 | -0.49 | 1       |                |            |
| <b>ΣPFASs(DF&gt;50%)</b> | -0.88*      | -0.84* | -0.85*   | 0.80*  | 0.89* | 0.86* | 0.83* | 0.87* | -0.21   | 1              |            |
| <b>PFHpA/PFNA</b>        | -0.79*      | -0.83* | -0.80*   | 0.54*  | 0.94* | 0.78* | 0.52* | 0.58* | -0.33   | 0.79*          | 1          |

**Table S18: Detection frequencies [%], concentration ranges [pg/L], mean concentrations [pg/L] and median values [pg/L] of detected PFASs in all samples and in different water masses (Atlantic Water (AW), Polar Surface Water (PSW)) of the seven depth profiles taken in Fram Strait. Values in brackets are between MDL and MQL.**

| PFASs <sup>1</sup>                   | all samples (n=58) |              |             |               | Atlantic Water (AW)<br>(n=18) |              |             |               | Polar Surface Water (PSW)<br>(n=16) |              |             |               |
|--------------------------------------|--------------------|--------------|-------------|---------------|-------------------------------|--------------|-------------|---------------|-------------------------------------|--------------|-------------|---------------|
|                                      | DF [%]             | range [pg/L] | mean [pg/L] | median [pg/L] | DF [%]                        | range [pg/L] | mean [pg/L] | median [pg/L] | DF [%]                              | range [pg/L] | mean [pg/L] | median [pg/L] |
| <b>HFPO-DA</b>                       | 21                 | <MDL-(17)    | -           | -             | 39                            | <MDL-(14)    | -           | -             | 19                                  | <MDL-(12)    | -           | -             |
| <b>PFHxA</b>                         | 91                 | <MDL-74      | 37          | 39            | 100                           | (25)-54      | 41          | 40            | 100                                 | 41-74        | 54          | 53            |
| <b>PFHpA</b>                         | 81                 | <MDL-56      | 24          | 24            | 100                           | (14)-32      | 25          | 26            | 100                                 | 26-56        | 42          | 44            |
| <b>PFOA</b>                          | <sup>2a</sup>      | <MDL-120     | 49          | 50            | <sup>2b</sup>                 | 44-72        | 55          | 52            | <sup>2c</sup>                       | 48-120       | 76          | 60            |
| <b>PFNA</b>                          | 91                 | <MDL-51      | 25          | 26            | 100                           | (19)-39      | 31          | 29            | 100                                 | (21)-51      | 31          | 28            |
| <b>PFDA</b>                          | 24                 | <MDL-(21)    | -           | -             | 56                            | <MDL-(16)    | (7.8)       | 13            | 25                                  | <MDL-(21)    | -           | -             |
| <b>PFUnDA</b>                        | 66                 | <MDL-15      | (5.6)       | (6.6)         | 78                            | <MDL-15      | (7.2)       | (8.0)         | 69                                  | <MDL-14      | (6.0)       | (6.7)         |
| <b>PFBS</b>                          | 57                 | <MDL-50      | 16          | 17            | 61                            | <MDL-(34)    | (13)        | (16)          | 100                                 | (21)-50      | (36)        | (37)          |
| <b>PFHxS</b>                         | 34                 | <MDL-(29)    | -           | -             | 17                            | <MDL-(28)    | -           | -             | 75                                  | <MDL-(29)    | (17)        | (22)          |
| <b>L-PFOS</b>                        | 36                 | <MDL-44      | -           | -             | 83                            | <MDL-44      | (22)        | (23)          | 19                                  | <MDL-(33)    | -           | -             |
| <b>Br-PFOS</b>                       | 43                 | <MDL-33      | -           | -             | 83                            | <MDL-27      | (13)        | (15)          | 38                                  | <MDL-33      | -           | -             |
| <b>ΣPFASs(DF&gt;50%)<sup>3</sup></b> | -                  | <MDL-230     | 110         | 110           | -                             | 64-140       | 120         | 120           | -                                   | 120-230      | 170         | 170           |

<sup>1</sup> Due to high blanks, no values can be reported for PFBA. In addition, PFPeA could not be evaluated because of matrix interferences.

<sup>2</sup> PFOA could not be evaluated in a) 29, b) 6, c) 11 of the samples because of matrix interferences. The given values refer to only the samples in which no interferences occurred.

<sup>3</sup> ΣPFASs only includes the compounds with a detection frequency >50% in all depth profiles samples (C6, C7, C9, C11 PFCAs and PFBS).



**Table S19: Detection frequencies [%], concentration ranges [pg/L], mean concentrations [pg/L] and median values [pg/L] of detected PFASs in different water masses (Recirculating Atlantic Water/Arctic Atlantic Water (RAW/AAW), Intermediate Waters (IW) and Deep Waters (DW)) of the seven depth profiles taken in Fram Strait. Values in brackets are between MDL and MQL.**

| PFASs <sup>1</sup>       | Recirculating Atlantic Water/Arctic Atlantic Water (RAW/AAW)<br>(n=10) |              |             |               | Intermediate Waters (IW)<br>(n=6) |              |             |               | Deep Waters (DW)<br>(n=8) |              |             |               |
|--------------------------|------------------------------------------------------------------------|--------------|-------------|---------------|-----------------------------------|--------------|-------------|---------------|---------------------------|--------------|-------------|---------------|
|                          | DF [%]                                                                 | range [pg/L] | mean [pg/L] | median [pg/L] | DF [%]                            | range [pg/L] | mean [pg/L] | median [pg/L] | DF [%]                    | range [pg/L] | mean [pg/L] | median [pg/L] |
| <b>HFPO-DA</b>           | 20                                                                     | <MDL-(17)    | -           | -             | 0                                 | <MDL         | -           | -             | 0                         | <MDL         | -           | -             |
| <b>PFHxA</b>             | 100                                                                    | (22)-66      | 34          | 30            | 100                               | (14)-43      | 28          | 28            | 38                        | <MDL-(20)    | -           | -             |
| <b>PFHpA</b>             | 90                                                                     | <MDL-46      | (21)        | (20)          | 50                                | <MDL-19      | 8.5         | 8.0           | 13                        | <MDL-(20)    | -           | -             |
| <b>PFOA</b>              | <sup>2a</sup>                                                          | 36-94        | 54          | 48            | <sup>2b</sup>                     | 34-50        | 40          | 37            | <sup>2c</sup>             | <MDL         | -           | -             |
| <b>PFNA</b>              | 100                                                                    | (14)-34      | 22          | (20)          | 100                               | (16)-26      | (21)        | 20            | 38                        | <MDL-(19)    | -           | -             |
| <b>PFDA</b>              | 0                                                                      | <MDL         | -           | -             | 0                                 | <MDL         | -           | -             | 0                         | <MDL         | -           | -             |
| <b>PFUnDA</b>            | 70                                                                     | <MDL-(10)    | (5.1)       | (6.1)         | 67                                | <MDL-13      | (6.1)       | (7.1)         | 25                        | <MDL-(7.3)   | -           | -             |
| <b>PFBS</b>              | 30                                                                     | <MDL-(33)    | -           | -             | 50                                | <MDL-(25)    | (10)        | (7.0)         | 0                         | <MDL         | -           | -             |
| <b>PFHxS</b>             | 40                                                                     | <MDL-(23)    | -           | -             | 17                                | <MDL-(23)    | -           | -             | 0                         | <MDL         | -           | -             |
| <b>L-PFOS</b>            | 10                                                                     | <MDL-(33)    | -           | -             | 33                                | <MDL-(36)    | -           | -             | 0                         | <MDL         | -           | -             |
| <b>Br-PFOS</b>           | 20                                                                     | <MDL-31      | -           | -             | 33                                | <MDL-(17)    | -           | -             | 0                         | <MDL         | -           | -             |
| <b>ΣPFASs(DF&gt;50%)</b> | -                                                                      | 60-180       | 90          | 76            | -                                 | 40-120       | 73          | 73            | -                         | <MDL-40      | 16          | 13            |

<sup>1</sup> Due to high blanks, no values can be reported for PFBA. In addition, PFPeA could not be evaluated because of matrix interferences.

<sup>2</sup> PFOA could not be evaluated in a) 4, b) 3, c) 4 of the samples because of matrix interferences. The given values refer to only the samples in which no interferences occurred.

<sup>3</sup> ΣPFASs only includes the compounds with a detection frequency >50% in all depth profiles samples (C6, C7, C9, C11 PFCAs and PFBS).

**Table S20: Concentrations [pg/L] of detected PFASs in depth profiles.** Values in brackets are between MDL and MQL.

| sample name | sampling depth | water mass | HFPO-DA | PFHxA | PFHpA | PFOA            | PFNA | PFDA | PFUnDA | PFBS | PFHxS | L-PFOS | Br-PFOS | ΣPFASs(DF>50%) <sup>2</sup> |
|-------------|----------------|------------|---------|-------|-------|-----------------|------|------|--------|------|-------|--------|---------|-----------------------------|
| V1/1        | 1239           | DW         | <MDL    | <MDL  | <MDL  | na <sup>1</sup> | <MDL | <MDL | <MDL   | <MDL | <MDL  | <MDL   | <MDL    | 0.0                         |
| V1/2        | 1000           | DW         | <MDL    | (20)  | (20)  | na              | <MDL | <MDL | <MDL   | <MDL | <MDL  | <MDL   | <MDL    | 40.0                        |
| V1/3        | 500            | AW         | <MDL    | (25)  | (21)  | na              | (19) | <MDL | <MDL   | <MDL | <MDL  | <MDL   | <MDL    | 64.7                        |
| V1/4        | 250            | AW         | <MDL    | 33    | 24    | na              | 24   | <MDL | <MDL   | <MDL | <MDL  | <MDL   | <MDL    | 81.7                        |
| V1/5        | 100            | AW         | <MDL    | 28    | 26    | na              | 23   | <MDL | <MDL   | (34) | <MDL  | <MDL   | <MDL    | 110.5                       |
| V1/6        | 75             | AW         | <MDL    | 41    | 24    | na              | 34   | (14) | (8.1)  | <MDL | <MDL  | (26)   | (17)    | 106.8                       |
| V1/7        | 50             | AW         | <MDL    | 36    | 29    | na              | 28   | (13) | (6.4)  | <MDL | <MDL  | (23)   | (16)    | 99.2                        |
| V1/8        | 10             | AW         | <MDL    | 32    | 26    | na              | 29   | (15) | (8.1)  | (20) | <MDL  | (21)   | (13)    | 114.7                       |
| V2/1        | 2286           | DW         | <MDL    | <MDL  | <MDL  | <MDL            | <MDL | <MDL | (7.1)  | <MDL | <MDL  | <MDL   | <MDL    | 7.1                         |
| V2/2        | 1000           | IW         | <MDL    | 30    | <MDL  | 37              | 26   | <MDL | 13     | (21) | <MDL  | <MDL   | <MDL    | 89.4                        |
| V2/3        | 500            | AW         | <MDL    | 35    | (14)  | 44              | 35   | <MDL | (9.2)  | (18) | <MDL  | (28)   | (16)    | 110.6                       |
| V2/4        | 250            | AW         | <MDL    | 53    | 21    | 52              | 34   | (13) | (8.0)  | (16) | <MDL  | (24)   | (13)    | 132.7                       |
| V2/5        | 100            | AW         | <MDL    | 43    | 31    | 50              | 39   | (16) | 14     | (15) | <MDL  | (21)   | (16)    | 141.9                       |
| V2/6        | 75             | AW         | <MDL    | 50    | 32    | 67              | 31   | (14) | (11)   | <MDL | <MDL  | (22)   | (13)    | 124.3                       |
| V2/7        | 40             | AW         | (11)    | 39    | 24    | 55              | 34   | (14) | (10)   | <MDL | <MDL  | (27)   | (13)    | 107.4                       |
| V2/8        | 10             | AW         | (9.9)   | 54    | 28    | 60              | 38   | (15) | (15)   | <MDL | <MDL  | (44)   | (27)    | 135.6                       |
| V3/1        | 2573           | DW         | <MDL    | <MDL  | <MDL  | <MDL            | <MDL | <MDL | <MDL   | <MDL | <MDL  | <MDL   | <MDL    | 0.0                         |
| V3/2        | 1001           | IW         | <MDL    | 37    | (15)  | 34              | (18) | <MDL | (9.8)  | <MDL | <MDL  | (36)   | (17)    | 80.2                        |
| V3/3        | 501            | AW         | <MDL    | 32    | (19)  | 48              | 28   | <MDL | (10)   | (19) | <MDL  | (21)   | (13)    | 107.6                       |
| V3/4        | 250            | AW         | (14)    | 48    | 29    | 52              | 38   | (14) | (12)   | (15) | <MDL  | (21)   | (15)    | 142.5                       |
| V3/5        | 100            | AW         | (14)    | 45    | 27    | 48              | 29   | <MDL | <MDL   | (21) | (21)  | (23)   | (16)    | 122.8                       |
| V3/6        | 75             | AW         | (13)    | 47    | 32    | 72              | 29   | <MDL | (6.6)  | (21) | (20)  | (22)   | (18)    | 135.2                       |
| V3/7        | 50             | AW         | (11)    | 53    | 23    | 62              | 27   | <MDL | (6.6)  | (28) | (28)  | (23)   | (16)    | 138.9                       |
| V3/8        | 10             | AW         | (8.0)   | 39    | 26    | 46              | 29   | (13) | (5.0)  | (30) | <MDL  | (40)   | (20)    | 129.6                       |
| V4/1        | 2600           | DW         | <MDL    | <MDL  | <MDL  | na              | (19) | <MDL | <MDL   | <MDL | <MDL  | <MDL   | <MDL    | 19.2                        |
| V4/2        | 2000           | DW         | <MDL    | (14)  | <MDL  | na              | (12) | <MDL | <MDL   | <MDL | <MDL  | <MDL   | <MDL    | 26.4                        |
| V4/3        | 1200           | IW         | <MDL    | (14)  | <MDL  | na              | (18) | <MDL | <MDL   | (14) | <MDL  | <MDL   | <MDL    | 46.2                        |
| V4/4        | 1000           | IW         | <MDL    | (26)  | (19)  | na              | 21   | <MDL | <MDL   | <MDL | <MDL  | <MDL   | <MDL    | 65.8                        |
| V4/5        | 700            | RAW/AAW    | <MDL    | (22)  | (15)  | na              | (20) | <MDL | <MDL   | <MDL | <MDL  | <MDL   | <MDL    | 56.7                        |
| V4/6        | 500            | RAW/AAW    | <MDL    | (23)  | (18)  | na              | 25   | <MDL | (10)   | <MDL | <MDL  | <MDL   | <MDL    | 75.5                        |
| V4/7        | 250            | RAW/AAW    | <MDL    | 28    | (19)  | na              | 22   | <MDL | (7.8)  | <MDL | <MDL  | <MDL   | <MDL    | 76.6                        |
| V4/8        | 100            | PW         | <MDL    | 41    | 26    | na              | 25   | <MDL | (7.2)  | (23) | (22)  | <MDL   | <MDL    | 122.8                       |
| V4/9        | 75             | PW         | <MDL    | 48    | 28    | na              | 27   | <MDL | (6.3)  | (21) | (24)  | (22)   | (17)    | 130.3                       |
| V4/10       | 60             | PW         | <MDL    | 51    | 41    | na              | 26   | <MDL | (5.6)  | (38) | (25)  | <MDL   | <MDL    | 161.8                       |
| V4/11       | 40             | PW         | <MDL    | 56    | 40    | na              | 28   | <MDL | (9.0)  | (32) | (23)  | <MDL   | <MDL    | 165.6                       |
| V4/12       | 15             | PW         | <MDL    | 59    | 45    | na              | 36   | <MDL | (6.1)  | (24) | (23)  | <MDL   | <MDL    | 169.5                       |
| V4/13       | 5              | PW         | <MDL    | 42    | 56    | na              | 44   | (14) | 13     | (31) | <MDL  | <MDL   | <MDL    | 186.2                       |
| V5/1        | 959            | IW         | <MDL    | (16)  | <MDL  | na              | (16) | <MDL | (4.9)  | <MDL | <MDL  | <MDL   | <MDL    | 37.7                        |
| V5/2        | 500            | RAW/AAW    | <MDL    | (25)  | (16)  | na              | (18) | <MDL | (5.7)  | <MDL | <MDL  | <MDL   | <MDL    | 65.2                        |

|      |      |         |       |      |      |      |      |      |       |      |      |      |      |       |
|------|------|---------|-------|------|------|------|------|------|-------|------|------|------|------|-------|
| V5/3 | 250  | RAW/AAW | <MDL  | (24) | 22   | na   | (20) | <MDL | (7.5) | <MDL | (19) | <MDL | <MDL | 73.8  |
| V5/4 | 100  | PW      | <MDL  | 48   | 31   | na   | 26   | <MDL | (8.6) | (36) | (19) | <MDL | <MDL | 148.8 |
| V5/5 | 75   | PW      | <MDL  | 52   | 41   | na   | (21) | <MDL | <MDL  | 47   | (18) | <MDL | <MDL | 160.0 |
| V5/6 | 50   | PW      | <MDL  | 46   | 50   | na   | 24   | <MDL | <MDL  | (38) | (25) | <MDL | <MDL | 157.5 |
| V5/7 | 26   | PW      | <MDL  | 54   | 51   | na   | 34   | <MDL | (7.7) | (35) | (22) | <MDL | <MDL | 182.1 |
| V5/8 | 5    | PW      | <MDL  | 44   | 46   | na   | 51   | (21) | (14)  | (28) | (25) | <MDL | <MDL | 183.8 |
| V6/1 | 271  | RAW/AAW | <MDL  | 36   | <MDL | 36   | (14) | <MDL | <MDL  | (23) | <MDL | <MDL | <MDL | 72.8  |
| V6/2 | 150  | RAW/AAW | (8.4) | 44   | 23   | 39   | (19) | <MDL | <MDL  | (33) | <MDL | <MDL | (20) | 117.6 |
| V6/3 | 100  | PW      | (12)  | 57   | 32   | 48   | 21   | <MDL | <MDL  | (44) | <MDL | <MDL | (17) | 153.8 |
| V6/4 | 50   | PW      | (9.2) | 61   | 47   | 60   | 27   | <MDL | <MDL  | (42) | <MDL | <MDL | (17) | 177.7 |
| V6/5 | 10   | PW      | (9.8) | 56   | 47   | 51   | 28   | <MDL | <MDL  | (43) | <MDL | <MDL | (12) | 174.0 |
| V7/1 | 3117 | DW      | <MDL  | <MDL | <MDL | <MDL | <MDL | <MDL | <MDL  | <MDL | <MDL | <MDL | <MDL | 0.0   |
| V7/2 | 2000 | DW      | <MDL  | (15) | <MDL | <MDL | (14) | <MDL | (7.3) | <MDL | <MDL | <MDL | <MDL | 36.4  |
| V7/3 | 1000 | IW      | <MDL  | 43   | (17) | 50   | 24   | <MDL | (9.2) | (25) | (23) | (22) | (13) | 118.7 |
| V7/4 | 500  | RAW/AAW | <MDL  | 33   | 22   | 48   | (20) | <MDL | (6.5) | <MDL | (20) | <MDL | <MDL | 81.6  |
| V7/5 | 250  | RAW/AAW | (17)  | 36   | 32   | 52   | 31   | <MDL | (5.6) | <MDL | (20) | <MDL | <MDL | 105.0 |
| V7/6 | 100  | RAW/AAW | <MDL  | 66   | 46   | 94   | 34   | <MDL | (7.7) | (21) | (23) | (33) | 31   | 175.0 |
| V7/7 | 50   | PW      | <MDL  | 74   | 43   | 120  | 39   | (12) | (9.4) | 45   | (29) | (30) | (26) | 210.9 |
| V7/8 | 10   | PW      | <MDL  | 73   | 55   | 110  | 41   | (11) | (8.2) | 50   | (19) | (33) | 33   | 226.1 |

<sup>1</sup>na: not analyzable (PFOA could not be evaluated these samples because of matrix interferences)

<sup>2</sup>ΣPFASs only includes the compounds with a detection frequency >50% in all depth profiles samples (C6, C7, C9, C11 PFCA and PFBS).

**Table S21: Water mass definitions used for classification of water samples taken for this study, adapted from Rudels et al.<sup>5</sup>** Boundaries of potential temperature  $\Theta$  [ $^{\circ}\text{C}$ ] and potential density  $\sigma$  [ $\text{kg}/\text{m}^3$ ] are given.  $\sigma_0$  and  $\sigma_{500}$  is potential density at reference pressure 0 m (sea surface) and 500 m. Deviating from the definition by Rudels et al.<sup>5</sup>, water with a potential density  $\sigma$  lower than  $27.70 \text{ kg}/\text{m}^3$  is included in the definition of Atlantic Water to also classify surface water in the West Spitsbergen Current as Atlantic Water. Moreover, our water mass definitions do not differentiate between Recirculating Atlantic Water and Arctic Atlantic Water and between different classes of Intermediate Water and Deep Water.

| <b>Water mass (acronym)</b>                       | <b>Definition</b>                                           |
|---------------------------------------------------|-------------------------------------------------------------|
| Atlantic Water (AW)                               | $0 < \Theta, \sigma_0 \leq 27.97$                           |
| Polar Surface Water (PSW)                         | $\Theta \leq 0, \sigma_0 \leq 27.70$                        |
| Recirculating and Arctic Atlantic Water (RAW/AAW) | $0 < \Theta, 27.70 < \sigma_0, \sigma_{500} \leq 30.444$    |
| Intermediate Water (IW)                           | $\Theta \leq 0, 27.97 < \sigma_0, \sigma_{500} \leq 30.444$ |
| Deep Water (DW)                                   | $\Theta \leq 0, 30.444 \leq \sigma_{500}$                   |

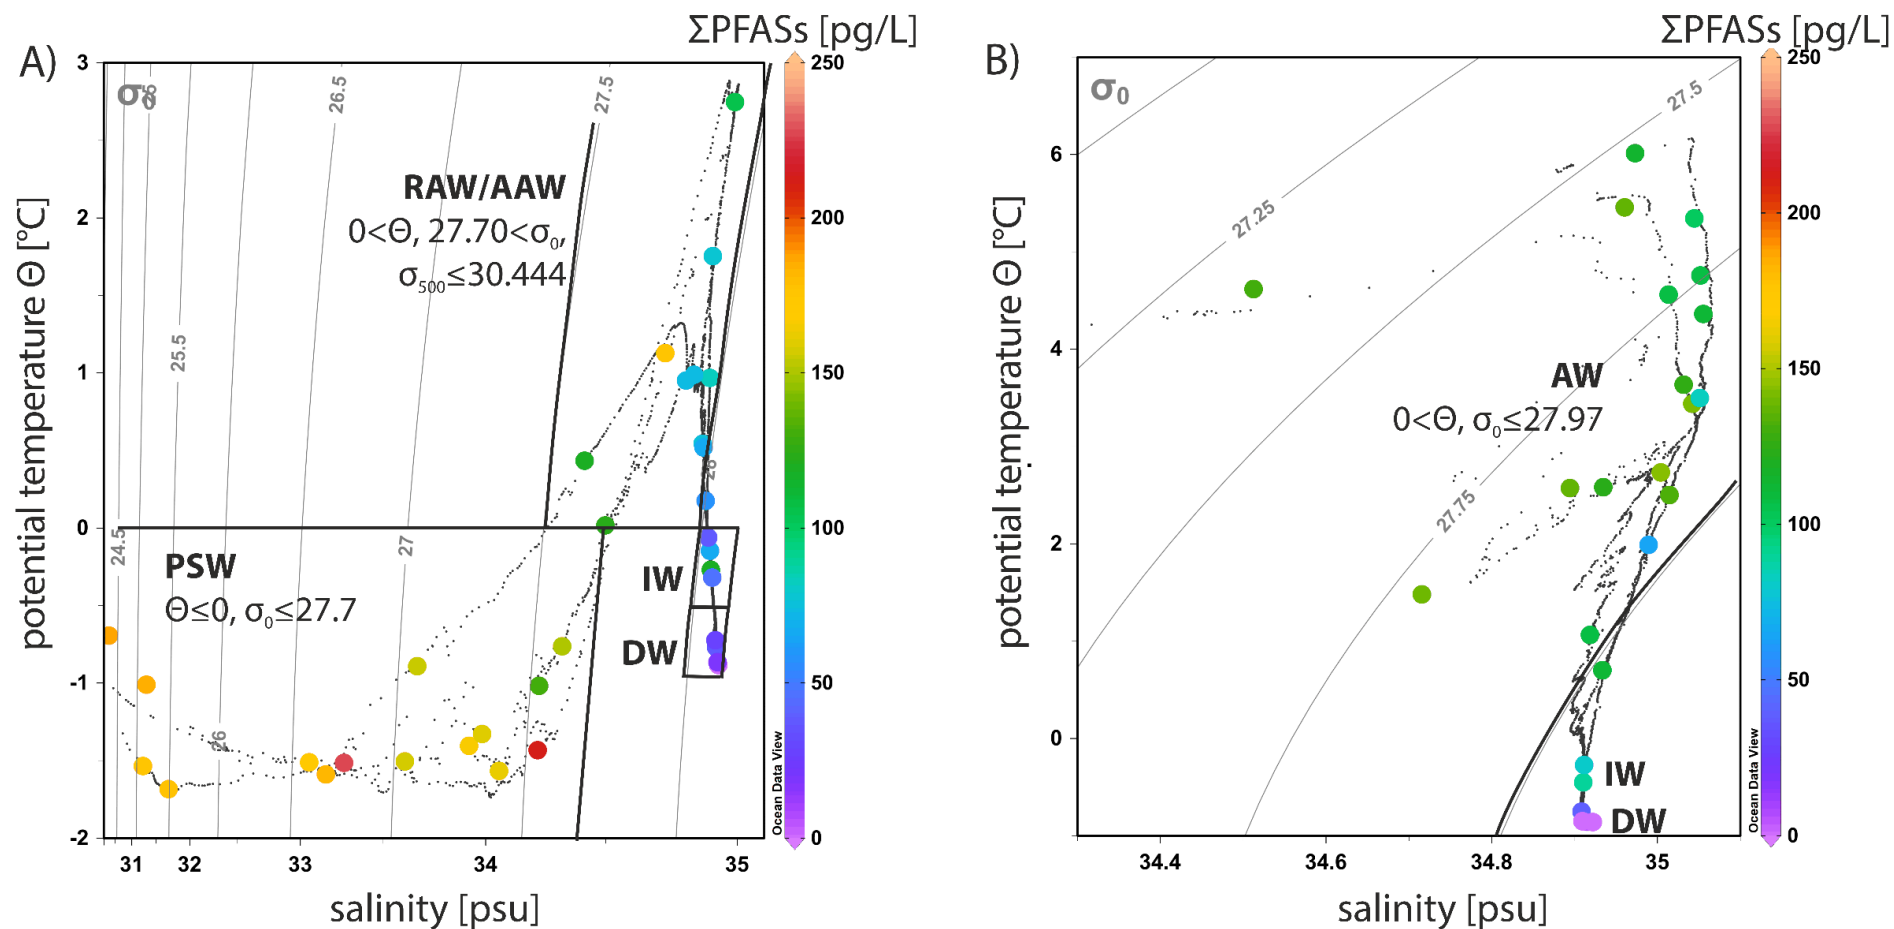

**Figure S9:** Potential temperature  $\theta$  [°C] versus salinity [psu] plots for A) CTD/rosette casts taken west of the surface front between inflowing Atlantic Water (AW) and outflowing Polar Surface Water (PSW) (~79°N) and B) CTD/rosette casts taken east of it. Note that in order to show the vast range of salinity values, the x-scale in A) is non-linear and in B) it is a zoom on the Atlantic water masses that is linear. Temperature and salinity data was taken from references <sup>4</sup> and <sup>3</sup>. Samples analyzed for PFASs are color-coded depending on the sum of PFASs with a detection frequency >50% (C<sub>6</sub>, C<sub>7</sub>, C<sub>9</sub>, C<sub>11</sub> PFCAs and PFBS). Thin gray contour lines show potential density isopycnals referenced to 0 dbar ( $\sigma_0$  [kg/m<sup>3</sup>]). Solid black lines highlight water mass boundaries. Water mass definitions for AW, PSW, Recirculating/Arctic Atlantic Water (RAW/AAW), Intermediate Water (IW;  $\theta \leq 0, 27.97 < \sigma_0, \sigma_{500} \leq 30.444$ ) and Deep Water (DW;  $\theta \leq 0, 30.444 \leq \sigma_{500}$ ) were adapted from reference <sup>5</sup> (Table S21). Data were plotted using Ocean Data View.<sup>25</sup>

**Table S22: PFAS mass transport estimates through Fram Strait via the boundary currents, based on water transport data derived from MITgcm model (section S4).** All values <MDL were replaced by a) zero (blue), b)  $\sqrt{2}$  times the MDL (yellow) c) the MDL (green) to calculate the mean value for each water mass. To calculate the PFAS transport, the mean PFAS concentration of AW, PW and RAW/AAW was multiplied by the transported water volume of the particular water mass, derived from the MITgcm. Positive values describe northward fluxes into the Arctic Ocean, whereas negative values describe southward fluxes to the Nordic Seas. Italicized values are derived from datasets with detection frequencies <50%. If detection frequency of a compound was 100 % in a specific water mass, only one mass transport estimate is given.

| Transport through Fram Strait (mean±SD) [kg/y] |                             |            |                   |            |           |                |                 |                   |                  |                  |                  |                 |
|------------------------------------------------|-----------------------------|------------|-------------------|------------|-----------|----------------|-----------------|-------------------|------------------|------------------|------------------|-----------------|
| water mass                                     | Substitution of values <MDL | PFHxA      | PFHpA             | PFOA       | PFNA      | PFDA           | PFUnDA          | PFBS              | PFHxS            | L-PFOS           | Br-PFOS          | HFPO-DA         |
| AW                                             | 0                           |            |                   |            |           | 920±852        | 850±553         | 1546±1393         | 446±1041         | 2536±1383        | 1587±827         | 523±629         |
|                                                | $\sqrt{2}$ *MDL             | 4819±1058  | 2984±560          | 6446±1026  | 3595±656  | 1159±580       | 919±446         | 1980±912          | 1719±475         | 2833±886         | 1753±520         | 829±450         |
|                                                | MDL                         |            |                   |            |           | 1258±468       | 947±407         | 2160±746          | 2247±267         | 2956±769         | 1822±431         | 956±353         |
| PW                                             | 0                           |            |                   |            |           | <i>-69±130</i> | <i>-116±92</i>  |                   | <i>-330±204</i>  | <i>-102±224</i>  | <i>-148±215</i>  | <i>-37±80</i>   |
|                                                | $\sqrt{2}$ *MDL             | -1043±190  | -819±176          | -1471±624  | -603±166  | <i>-136±93</i> | <i>-132±72</i>  | -697±170          | <i>-393±100</i>  | <i>-340±1120</i> | <i>-251±143</i>  | <i>-104±47</i>  |
|                                                | MDL                         |            |                   |            |           | <i>-163±78</i> | <i>-138±64</i>  |                   | <i>-419±65</i>   | <i>-438±67</i>   | <i>-293±117</i>  | <i>-131±34</i>  |
| RAW/AAW                                        | 0                           |            | <i>-2557±1439</i> |            |           | <i>0±0</i>     | <i>-616±453</i> | <i>-932±1545</i>  | <i>-998±1295</i> | <i>-403±1275</i> | <i>-615±1329</i> | <i>-302±677</i> |
|                                                | $\sqrt{2}$ *MDL             | -4069±1618 | <i>-2657±1265</i> | -6512±2843 | -2705±741 | <i>-551±0</i>  | <i>-712±313</i> | <i>-1733±1017</i> | <i>-1938±497</i> | <i>-2047±698</i> | <i>-1435±913</i> | <i>-713±479</i> |
|                                                | MDL                         |            | <i>-2699±1211</i> |            |           | <i>-779±0</i>  | <i>-751±260</i> | <i>-2065±807</i>  | <i>-2328±196</i> | <i>-2728±458</i> | <i>-1774±746</i> | <i>-883±403</i> |
| Net                                            | 0                           |            | <i>-392</i>       |            |           | <i>851</i>     | <i>118</i>      | <i>-83</i>        | <i>-882</i>      | <i>2030</i>      | <i>824</i>       | <i>184</i>      |
|                                                | $\sqrt{2}$ *MDL             | -292       | <i>-492</i>       | -1537      | 287       | <i>472</i>     | <i>75</i>       | <i>-450</i>       | <i>-612</i>      | <i>445</i>       | <i>68</i>        | <i>12</i>       |
|                                                | MDL                         |            | <i>-534</i>       |            |           | <i>315</i>     | <i>58</i>       | <i>-602</i>       | <i>-500</i>      | <i>-211</i>      | <i>-245</i>      | <i>-59</i>      |

**Table S23: PFAS mass transport estimates through Fram Strait via the boundary currents, based on water transport data derived from observations (mooring array)<sup>15</sup> (section S4).** Values were calculated as explained for Table S22.

| Transport through Fram Strait (mean±SD) [kg/y] |                             |            |                   |            |           |                 |                 |                  |                  |                  |                  |                 |
|------------------------------------------------|-----------------------------|------------|-------------------|------------|-----------|-----------------|-----------------|------------------|------------------|------------------|------------------|-----------------|
| water mass                                     | Substitution of values <MDL | PFHxA      | PFHpA             | PFOA       | PFNA      | PFDA            | PFUnDA          | PFBS             | PFHxS            | L-PFOS           | Br-PFOS          | HFPO-DA         |
| AW                                             | 0                           |            |                   |            |           | 1083±1003       | 1000±651        | 1820±1640        | 525±1226         | 2985±1628        | 1868±973         | 616±814         |
|                                                | $\sqrt{2}$ *MDL             | 5674±1246  | 3512±660          | 7588±1207  | 4233±772  | 1364±683        | 1082±525        | 2331±1074        | 2024±559         | 3335±1043        | 2064±612         | 976±529         |
|                                                | MDL                         |            |                   |            |           | 1481±551        | 1115±479        | 2543±879         | 2645±314         | 3479±906         | 2145±507         | 1126±416        |
| PW                                             | 0                           |            |                   |            |           | <i>-159±296</i> | <i>-264±210</i> |                  | <i>-754±466</i>  | <i>-233±510</i>  | <i>-338±490</i>  | <i>-84±182</i>  |
|                                                | $\sqrt{2}$ *MDL             | -2380±434  | -1868±402         | -3357±1425 | -1377±379 | <i>-310±212</i> | <i>-300±164</i> | -1592±389        | <i>-897±228</i>  | <i>-775±251</i>  | <i>-572±326</i>  | <i>-237±107</i> |
|                                                | MDL                         |            |                   |            |           | <i>-372±179</i> | <i>-315±146</i> |                  | <i>-956±149</i>  | <i>-1000±153</i> | <i>-669±268</i>  | <i>-300±77</i>  |
| RAW/AAW                                        | 0                           |            | <i>-2334±1314</i> |            |           | <i>0±0</i>      | <i>-563±413</i> | <i>-851±1411</i> | <i>-911±1183</i> | <i>-368±1164</i> | <i>-561±1214</i> | <i>-276±618</i> |
|                                                | $\sqrt{2}$ *MDL             | -3715±1477 | <i>-2426±1155</i> | -5945±2596 | -2470±677 | <i>-503±0</i>   | <i>-650±286</i> | <i>-1582±928</i> | <i>-1770±454</i> | <i>-1869±637</i> | <i>-1310±833</i> | <i>-651±438</i> |
|                                                | MDL                         |            | <i>-2464±1105</i> |            |           | <i>-712±0</i>   | <i>-686±237</i> | <i>-1885±737</i> | <i>-2125±179</i> | <i>-2491±418</i> | <i>-1620±681</i> | <i>-807±368</i> |
| Net                                            | 0                           |            | <i>-691</i>       |            |           | <i>924</i>      | <i>174</i>      | <i>-622</i>      | <i>-1140</i>     | <i>2384</i>      | <i>969</i>       | <i>256</i>      |
|                                                | $\sqrt{2}$ *MDL             | -421       | <i>-782</i>       | -1715      | 386       | <i>551</i>      | <i>131</i>      | <i>-843</i>      | <i>-643</i>      | <i>690</i>       | <i>182</i>       | <i>88</i>       |
|                                                | MDL                         |            | <i>-820</i>       |            |           | <i>397</i>      | <i>114</i>      | <i>-934</i>      | <i>-437</i>      | <i>-12</i>       | <i>-143</i>      | <i>19</i>       |

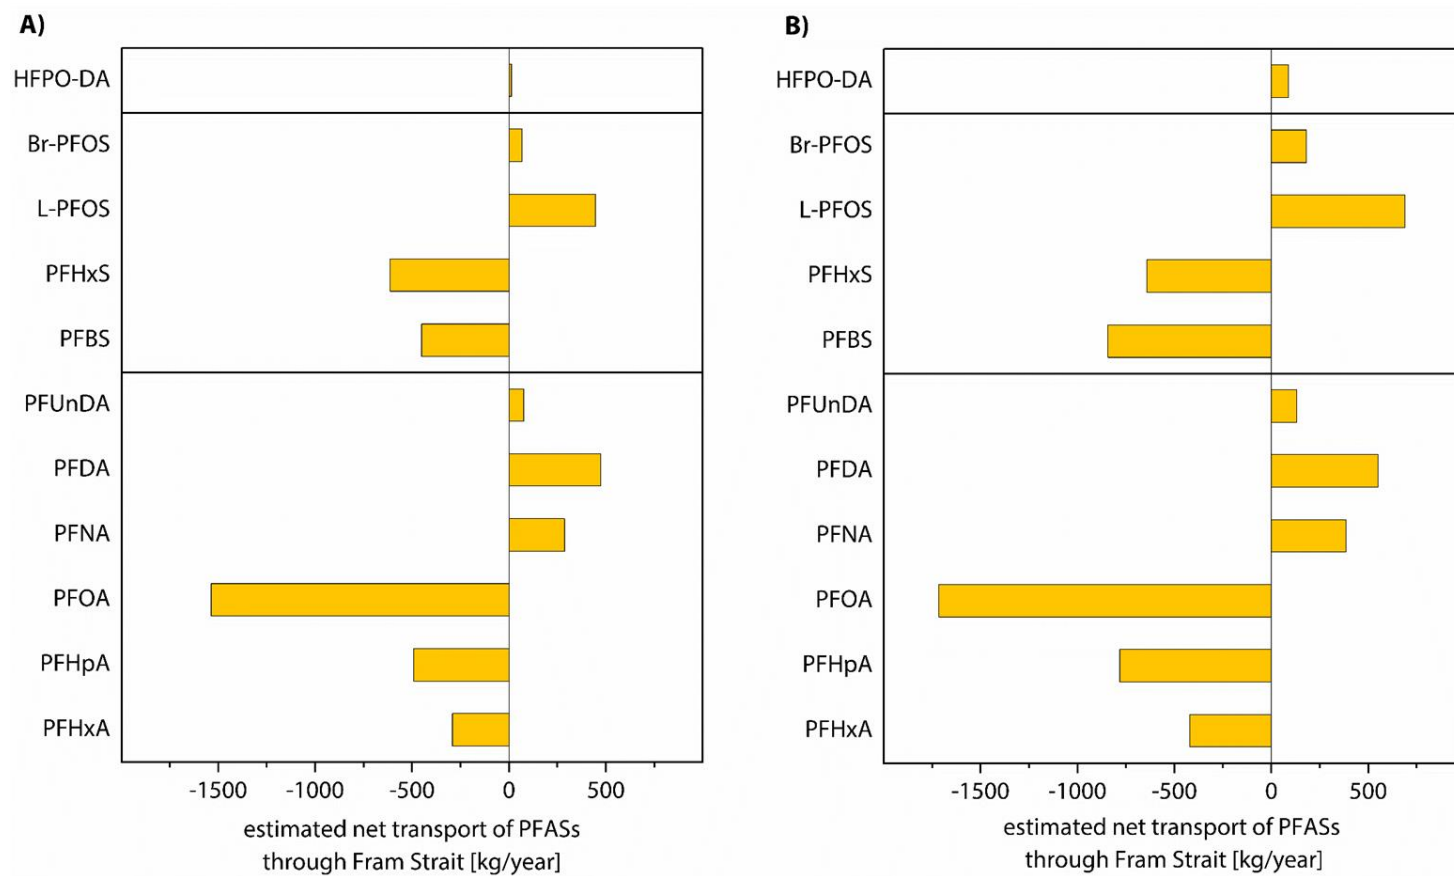

**Figure S10:** Comparison of estimated net transport of PFASs through Fram Strait via the boundary columns, calculated by combining measured PFAS concentrations in this study with average water volume transport derived from A) the MITgcm ECCO v4 and B) observational data (mooring array) (section S4).

## References

- (1) von Appen, W.-J.; Rohardt, G. Continuous thermosalinograph oceanography along POLARSTERN cruise track PS114. Alfred Wegener Institute, Helmholtz Centre for Polar and Marine Research, Bremerhaven, PANGAEA, **2019**. doi: 10.1594/PANGAEA.898225.
- (2) von Appen, W.-J. The Expedition PS114 of the Research Vessel POLARSTERN to the Fram Strait in 2018. Reports on polar and marine research, Bremerhaven, Alfred Wegener Institute for Polar and Marine Research: Bremerhaven, **2018**, 723; pp. 84; doi: 10.2312/BzPM\_0723\_2018.
- (3) von Appen, W.-J.; Schaffer, J.; Rohardt, G.; Wisotzki, A. Physical oceanography during POLARSTERN cruise PS114. Alfred Wegener Institute, Helmholtz Centre for Polar and Marine Research, Bremerhaven, PANGAEA, **2019**. doi: 10.1594/PANGAEA.898694.
- (4) von Appen, W.-J.; Schaffer, J.; Rohardt, G.; Wisotzki, A., Physical oceanography measured on water bottle samples during POLARSTERN cruise PS114. Alfred Wegener Institute, Helmholtz Centre for Polar and Marine Research, Bremerhaven, PANGAEA, **2019**. doi: 10.1594/PANGAEA.898695.
- (5) Rudels, B.; Björk, G.; Nilsson, J.; Winsor, P.; Lake, I.; Nohr, C. The interaction between waters from the Arctic Ocean and the Nordic Seas north of Fram Strait and along the East Greenland Current: results from the Arctic Ocean-02 Oden expedition. *Journal of Marine Systems* **2005**, 55 (1), 1-30.
- (6) Buck, R. C.; Franklin, J.; Berger, U.; Conder, J. M.; Cousins, I. T.; de Voogt, P.; Jensen, A. A.; Kannan, K.; Mabury, S. A.; van Leeuwen, S. P. Perfluoroalkyl and polyfluoroalkyl substances in the environment: terminology, classification, and origins. *Integr. Environ. Assess. Manag.* **2011**, 7 (4), 513-541.
- (7) Joerss, H.; Apel, C.; Ebinghaus, R. Emerging per- and polyfluoroalkyl substances (PFASs) in surface water and sediment of the North and Baltic Seas. *Sci. Total Environ.* **2019**, 686, 360-369.
- (8) Gremmel, C.; Frömel, T.; Knepper, T. P. HPLC–MS/MS methods for the determination of 52 perfluoroalkyl and polyfluoroalkyl substances in aqueous samples. *Analytical and Bioanalytical Chemistry* **2017**, 409 (6), 1643-1655.
- (9) Munoz, G.; Giraudel, J.-L.; Botta, F.; Lestremau, F.; Dévier, M.-H.; Budzinski, H.; Labadie, P. Spatial distribution and partitioning behavior of selected poly- and perfluoroalkyl substances in freshwater ecosystems: A French nationwide survey. *Sci. Total Environ.* **2015**, 517, 48-56.
- (10) Ramos, M. D.; van der Veen, I.; Charoud-Got, J.; Emteborg, H.; Weiss, J.; Schimmel, H. The certification of the mass concentration of perfluoroalkyl substances (PFASs) in water: IRMM-428. European Commission, Joint Research Centre, Institute for Reference Materials and Measurements (IRMM), **2015**. doi: 10.2787/736752.
- (11) Fieg, K.; Gerdes, R.; Fahrbach, E.; Beszczynska-Möller, A.; Schauer, U. Simulation of oceanic volume transports through Fram Strait 1995–2005. *Ocean Dynamics* **2010**, 60 (3), 491-502.
- (12) Beszczynska-Möller, A.; Fahrbach, E.; Schauer, U.; Hansen, E. Variability in Atlantic water temperature and transport at the entrance to the Arctic Ocean, 1997–2010. *ICES Journal of Marine Science* **2012**, 69 (5), 852-863.
- (13) de Steur, L.; Hansen, E.; Mauritzen, C.; Beszczynska-Möller, A.; Fahrbach, E. Impact of recirculation on the East Greenland Current in Fram Strait: Results from moored current meter measurements between 1997 and 2009. *Deep Sea Research Part I: Oceanographic Research Papers* **2014**, 92, 26-40.



- (14) Marnela, M.; Rudels, B.; Goszczko, I.; Beszczynska-Möller, A.; Schauer, U. Fram Strait and Greenland Sea transports, water masses, and water mass transformations 1999–2010 (and beyond). *Journal of Geophysical Research: Oceans* **2016**, *121* (4), 2314-2346.
- (15) Stöven, T.; Tanhua, T.; Hoppema, M.; von Appen, W. J. Transient tracer distributions in the Fram Strait in 2012 and inferred anthropogenic carbon content and transport. *Ocean Sci.* **2016**, *12* (1), 319-333.
- (16) von Appen, W.-J.; Schauer, U.; Somavilla, R.; Bauerfeind, E.; Beszczynska-Möller, A. Exchange of warming deep waters across Fram Strait. *Deep Sea Research Part I: Oceanographic Research Papers* **2015**, *103*, 86-100.
- (17) Forget, G.; Campin, J. M.; Heimbach, P.; Hill, C. N.; Ponte, R. M.; Wunsch, C. ECCO version 4: an integrated framework for non-linear inverse modeling and global ocean state estimation. *Geosci. Model Dev.* **2015**, *8* (10), 3071-3104.
- (18) Heydebreck, F.; Tang, J.; Xie, Z.; Ebinghaus, R. Alternative and legacy perfluoroalkyl substances: Differences between European and Chinese river/estuary Systems. *Environ. Sci. Technol.* **2015**, *49* (14), 8386-8395.
- (19) Brandsma, S. H.; Koekkoek, J. C.; van Velzen, M. J. M.; de Boer, J. The PFOA substitute GenX detected in the environment near a fluoropolymer manufacturing plant in the Netherlands. *Chemosphere* **2019**, *220*, 493-500.
- (20) Gebbink, W. A.; van Asseldonk, L.; van Leeuwen, S. P. J. Presence of emerging per- and polyfluoroalkyl Substances (PFASs) in river and drinking water near a fluorochemical production plant in the Netherlands. *Environ. Sci. Technol.* **2017**, *51* (19), 11057-11065.
- (21) Netherlands National Institute for Public Health and the Environment (RIVM) Evaluation of substances used in the GenX technology by Chemours, Dordrecht. *RIVM Letter report 2016-0174*, **2016**, pp 96. <https://www.rivm.nl/bibliotheek/rapporten/2016-0174.pdf> (accessed: 20 November 2019).
- (22) Smith, J. N.; McLaughlin, F. A.; Smethie Jr., W. M.; Moran, S. B.; Lepore, K. Iodine-129, 137Cs, and CFC-11 tracer transit time distributions in the Arctic Ocean. *Journal of Geophysical Research: Oceans* **2011**, *116*, 1-19.
- (23) Möller, A.; Ahrens, L.; Sturm, R.; Westerveld, J.; van der Wielen, F.; Ebinghaus, R.; de Voogt, P. Distribution and sources of polyfluoroalkyl substances (PFAS) in the River Rhine watershed. *Environ. Pollut.* **2010**, *158* (10), 3243-3250.
- (24) Grosfeld, K. T., R.; Asseng, J.; Bartsch, A.; Bräuer, B.; Fritsch, B.; Gerdes, R.; Hendricks, S.; Hiller, W.; Heygster, G.; Krumpfen, T.; Lemke, P.; Melsheimer, C.; Nicolaus, M.; Ricker, R. and Weigelt, M. Online sea-ice knowledge and data platform [www.meereisportal.de](http://www.meereisportal.de). *Polarforschung, Bremerhaven, Alfred Wegener Institute for Polar and Marine Research & German Society of Polar Research* **2016**, *85* (2), 143-155.
- (25) Schlitzer, R. Ocean Data View. <https://odv.awi.de>, 2018.
